# Supplementary material for: Emergence and diversification of a host-parasite RNA ecosystem through Darwinian evolution
Source: eLife. 2020 Jul 21;9:e56038. doi: 10.7554/eLife.56038 (PMC7378860; doi:10.7554/eLife.56038)
Supplement: Figure 2—source data 1. — Note that the coverage is 100% for all the reads. [file elife-56038-fig2-data1.xlsx]

## Sheet: Sheet1
	Host (PacBio RSⅡ)			Parasite-α (MiSeq)
	Round	Read number		Round	Read number
	13	4143		13	5000
	24	605		24	4990
	33	718		33	4999
	39	365		43	4986
	43	484		53	4987
	50	1020		60	4963
	53	1358		72	4994
	60	1409		86	4974
	65	3097		91	4998
	72	1364		94	4995
	86	2135		99	4984
	91	637		104	4926
	94	2058		110	4929
	99	855		115	4959
	104	2535
	110	1758
	115	4003
	Parasite-β (PacBio RSⅡ)			Parasite-γ (PacBio RSⅡ)
	Round	Read number		Round	Read number
	99	4999		115	1753
