# Supplementary material for: Emergence and diversification of a host-parasite RNA ecosystem through Darwinian evolution
Source: eLife. 2020 Jul 21;9:e56038. doi: 10.7554/eLife.56038 (PMC7378860; doi:10.7554/eLife.56038)
Supplement: Figure 4—source data 1. — Host-99 and Host-115, which exhibited distinct parasite resistance (Figure 4), have very different mutation sets with only three redundant dominant mutations each other. Mutation indexes correspond to those in Figure 2—figure supplement 3. [file elife-56038-fig4-data1.xlsx]

## Sheet: 99vs115
Mutation index	Host-99	Host-115	Amino acid change
3	＋	－	5'-UTR
4	＋	－
7	－	＋
8	＋	－
9	＋	＋
10	＋	＋
12	＋	－
13	－	＋
14	－	＋
27	＋	－
29	－	＋	Leu11Phe
37	－	＋	Val91Ala
38	－	＋	synonymous
40	＋	－	Gly124Cys
41	－	＋	synonymous
42	＋	－	synonymous
47	＋	－	synonymous
49	＋	＋	Lys208Glu
56	＋	－	Ser351Pro
58	－	＋	Tyr447His
59	＋	－	Leu448Arg
60	＋	－	Gln459Arg
61	＋	－	His460Arg
