# Supplementary material for: Emergence and diversification of a host-parasite RNA ecosystem through Darwinian evolution
Source: eLife. 2020 Jul 21;9:e56038. doi: 10.7554/eLife.56038 (PMC7378860; doi:10.7554/eLife.56038)
Supplement: Supplementary file 1. [file elife-56038-supp1.xlsx]

## Sheet: Reference sequences
The reference sequence used to determine the position of bases in Supplementary Figure 4.
	The sequence consists of the original host sequence with four dominant insertion cites (2045 bases in total). The potential insertion positions are represented with asterisks.
GGGAACCCCCCUUCGGGGGGUCACCUCGCGCAGCGGGCUACGCGAGGGAGCCACGCUGCGAAGCAGCGUGGCGGUUCUCGUGCGUCACCGAAACGCACGAAGGUCGCGCCUCUUCACGAGGCGUCACC*UGGGAGAGCGCGAAAGCGCUAGCCCGUGCUCUAGCUCUAGAAGGUCUCGAGAUCUCCUCUAGAGAUAAUUUUGUUUAACUCUAAGAAGGAGAUAUACACAUGCCUAAGACAGCAUCUUCGCGUAACUCUCUCAGCGCACAAUUGCGCCGAGCCGCGAACACAAGAA*UUGAGGCUGAAGGUAACCUCGCACUUUCCAUUGCCAACGAUUUACUGUUGGCCUAUGGUCAGUCGCCAUUUAACUCUGAGGCUGAGUGUAUUUCAUUCAGCCC…
Sequences of the host and parasitic RNAs used in the competitive replication assay
Host-0 (original host RNA)
GGGAACCCCCCUUCGGGGGGUCACCUCGCGCAGCGGGCUACGCGAGGGAGCCACGCUGCGAAGCAGCGUGGCGGUUCUCGUGCGUCACCGAAACGCACGAAGGUCGCGCCUCUUCACGAGGCGUCACCUGGGAGAGCGCGAAAGCGCUAGCCCGUGCUCUAGCUCUAGAAGGUCUCGAGAUCUCCUCUAGAGAUAAUUUUGUUUAACUCUAAGAAGGAGAUAUACACAUGCCUAAGACAGCAUCUUCGCGUAACUCUCUCAGCGCACAAUUGCGCCGAGCCGCGAACACAAGAAUUGAGGCUGAAGGUAACCUCGCACUUUCCAUUGCCAACGAUUUACUGUUGGCCUAUGGUCAGUCGCCAUUUAACUCUGAGGCUGAGUGUAUUUCAUUCAGCCCGA…
Host-99
GGGAACCCCCCUUCGGGGGGUCACCUCGCGCAGCGGGCUACGCGAGGGGGCCGCGCUGCGAAGCAGCGUGGCGGUUCACGUGCGUUACCGAAACGCACGAAGGUCGCGCCUCUCCGCGAGGCGUCACCUGGGAGAGCGCGAAAGCGCUAGCCCGUGCUCUAGCUCUAGAAGGUCUCGAGAUCUCCUCUAGAGAUAAUUUUGUUUAACUCUAAGAAGGAGAUAUGCACAUGCCUAAGACAGCAUCUUCGCGUAACUCUCUCAGCGCACAAUUGCGCCGAGCCGCGAACACAAGAAUUGAGGCUGAAGGUAACCUCGCACUUUCCAUUGCCAACGAUUUACUGUUGGCCUAUGGUCAGUCGCCAUUUAACUCUGAGGCUGAGUGUAUUUCAUUCAGCCCGA…
Host-115
GGGAACCCCCCUUCGGGGGGUCACCUCGCGCAGCGGGCUACGCGAGGGAGCCACGCUGCGAAGCAGCGUGGUGGUUCUCGUGCGUUACCGAAACGCACGAAGGUCGCGCCUCUCCACGAGGCGUCACCAUGGGAGAGCGCAAAAGCGCUAGCCCGUGCUCUAGCUCUAGAAGGUCUCGAGAUCUCCUCUAGAGAUAAUUUUGUUUAACUCUAAGAAGGAGAUAUACACAUGCCUAAGACAGCAUCUUCGCGUAACUCUUUCAGCGCACAAUUGCGCCGAGCCGCGAACACAAGAAUUGAGGCUGAAGGUAACCUCGCACUUUCCAUUGCCAACGAUUUACUGUUGGCCUAUGGUCAGUCGCCAUUUAACUCUGAGGCUGAGUGUAUUUCAUUCAGCCCG…
Parasite-α13
GGGAACCCCCCUUCGGGGGGUCACCUCGCGCAGCGGGCUGCGCGAAGGAGCCACGCUGCGAAGCAGUGUGGCGGUUCUCGUGCGUUACCGAAACGCACGAAGGUCGCGCCUCUUCACGAGGCGUCACCUGGGAGAGCGCGAAAGCGCUAGCCCGUGAUUCGUCACGGUCGAACUCCCGUACGAGGUGCCCGCACCUCGUCCCCCCCUUCCGGGGGGGUCCCC
Parasite-β99
GGGAACCCCCCUUCGGGGGGUCACCUCGCGCAGCGGGCUACGCGAGGGAGCCACGCUGCGAAGCAGCGUGGCGGUUCUCGUGCGUUACCGAAACGCACGAAGGUCGCGCCUCUCCGCGAGGCGUCACCUGGGAGAGCGCGAAAGCGCUAGCCCGUGCUCUAGCUCUAGAAGGUCUCGAGAUCUCCUUUAGAGAUAAUUUUGUUUAACUCUAAGAAGGAGAUAUGCACAUGCCUAAGACAGCAUCUUCGCGUAACUCUUUCAGCGCACAAUUGCGCCGAGCCGCGAACACAAGAAUUGAGGCUGAAGGUAACCUCGCACUUUCCAUUGCCAACGAUUUACUGUUGGCCUAUGGUCAGUCGCCAUUUAACUCUGAGGCUGAGUGUAUUUCAUUCAGCCCGA…
Parasite-γ115
GGGAACCCCCCUUCGGGGGGUCACCUCGCGCAGCGGGCUACGCGAGGGAGCCACCUGCGAAGCAGCGUGGCGGUUCUCGUGCGUUACCGAAACGCACGAAGGUCGCGCCUCUCCACGAGGCGUCACCAUGGGAGAGCGCAAAAGCGCUAGCCCGUGCUCUAGCUCUAGAAGGUCUCGAGAUCUCCUCUAGAGAUAAUUUUGUUUAACUCUAAGAAGGAGAUAUGCUUUAACGAACGCUCGUCUCUAUAGACCUGACUACAGUGAGGAUUUCAAUUUCUCACUGGGCGAGUCAUGUAUACACAUGGCUCGUCGAAAAAUAGCCAAGCUAAUAGGAGAUGUUCCGUCCGUUGAGGAUAUGUUGCGUCACUGCCGAUUUCCUGGCGGUGCUACAACAACGAA…

## Sheet: Primers
Primers used for RT-qPCR for measurement of host RNA concentrations in the long-term replication experiment
Primer 1 : GCTGCCTAAACAGCTGCAAC
Primer 2 : CGCTCTTGGTCCCTTGTATG
Primers for reverse transcription and PCR to recover cDNAs for sequence analysis
Primer 3 : CCGGAAGGGGGGGACGAGG
Primer 4 : GGGTCACCTCGCGCAGC
Primers for RT-qPCR for measurement of RNA concentrations in the competitive replication assay
Host-0 forward : ATACACATGGCTCGTAGAAAA
Host-0 reverse : GGCGTACACGCTTGCGGAAGT
Host-99 forward : TTTGTGAGATACTGGACTTAGACC
Host-99 reverse : GCAGCAACTTACGATACTTGC
Host-115 forward : CCTAGGGCCCATTCTGTGC
Host-115 reverse : GGTTTTTCGCGAAAGGATTGA
Parasite-α13 forward : TACCGAAACGCACGAAGG
Parasite-α13 reverse : CGTACGGGAGTTCGACCG
Parasite-β99 forward : GATAAATTGTCTTAAAGCCGAGG
Parasite-β99 reverse : CTCCTATTAGCTTGGCTATTTTTCC
Parasite-γ115 forward : TAAGAAGGAGATATGCTTTAACGAA
Parasite-γ115 reverse : TAGATCTCTCGAGTCTTGAAGGAC

## Sheet: Genotype frequency
Species	Round	Ranking	Read	Genotype
Host	13	1	2581	'000000000000000000000000000000000000000000000000000000000000000000000000'
Host	13	2	239	'000000000000000000000000000000000000000000000000001000000000000000000000'
Host	13	3	163	'000000000000000000000000000000000000000000000000000000001000000000000000'
Host	13	4	160	'000000000000000000000000000000000100000000000000000000000000000000000000'
Host	13	5	91	'000000000000000000000000000000000000000000000000010000000000000000000000'
Host	13	6	55	'000000000000001000000000000000000000000000000000000000000000000000000000'
Host	13	7	48	'000000000000000000000009000000000000000000000000000000000000000000000000'
Host	13	8	38	'020000000000000000000000000000000000000000000000000000000000000000000000'
Host	13	9	28	'000000000000000000000000000000000000000000000000001000001000000000000000'
Host	13	10	26	'000000000000000000000000000000000100000000000000000000001000000000000000'
Host	13	11	23	'000000000000000000000000000000000100000000000000001000000000000000000000'
Host	13	12	23	'000000000000000000000000000000000000000000000000900000000000000000000000'
Host	13	13	21	'000000000000000000000000000000000000000000000000000000009000000000000000'
Host	13	14	14	'000000000000000000000000000000000000000000000000011000000000000000000000'
Host	13	15	12	'000000000000000000000000000000000000000000000000010000001000000000000000'
Host	13	16	11	'000000000000001000000000000000000000000000000000001000000000000000000000'
Host	13	17	11	'020000000000000000000000000000000000000000000000001000000000000000000000'
Host	13	18	10	'000000000000000000000000000000010000000000000000000000000000000000000000'
Host	13	19	10	'000000000000000000000009000000000000000000000000001000000000000000000000'
Host	13	20	9	'000000000000000000009000000000000000000000000000000000000000000000000000'
Host	13	21	9	'000000000000000000000000000000000900000000000000000000000000000000000000'
Host	13	22	9	'000000000000000000000009000000000000000000000000000000001000000000000000'
Host	13	23	8	'000000000000000000000000000001000000000000000000000000000000000000000000'
Host	13	24	8	'000000000000000000000000000000000100000000000000001000001000000000000000'
Host	13	25	7	'000000000000000000000000000000000000000000000010000000000000000000000000'
Host	13	26	6	'000000000000000000000000000000000000000000000000009000000000000000000000'
Host	13	27	6	'000000000000000000000000000000000000000000000100000000000000000000000000'
Host	13	28	6	'000000000000000000000000000000000000000000000000000000000100000000000000'
Host	13	29	6	'000000000000000000000000000000000000001000000000000000000000000000000000'
Host	13	30	6	'000000000000000000000009000000000100000000000000000000000000000000000000'
Host	13	31	6	'000000000000000000000000000900000000000000000000000000000000000000000000'
Host	13	32	5	'000000000000000000000000000000000000000000000000000000000000009000000000'
Host	13	33	5	'000000000000000000000000000000000000100000000000000000000000000000000000'
Host	13	34	5	'000000090000000000000000000000000000000000000000000000000000000000000000'
Host	13	35	5	'000000000000000000000000000000000000000000000000000000000000000900000000'
Host	13	36	5	'000000000000000000000000000000000000000000001000000000000000000000000000'
Host	13	37	5	'000000000000000000000000001000000000000000000000000000000000000000000000'
Host	13	38	5	'000000000000000000000010000000000000000000000000000000000000000000000000'
Host	13	39	5	'020000000000000000000000000000000000000000000000010000000000000000000000'
Host	13	40	5	'000000000000000000000000000009000000000000000000000000000000000000000000'
Host	13	41	5	'020000000000000000000000000000000100000000000000000000000000000000000000'
Host	13	42	5	'000000000000000000000000000000000100000000000000010000000000000000000000'
Host	13	43	5	'000000000000000000000000090000000000000000000000000000000000000000000000'
Host	13	44	4	'000000000000000000000000000000000001000000000000000000000000000000000000'
Host	13	45	4	'000000000000000000000000000000000000000000010000000000000000000000000000'
Host	13	46	4	'000000000000000000000000000000000000000000000000000010000000000000000000'
Host	13	47	4	'000000000000000090000000000000000000000000000000000000000000000000000000'
Host	13	48	4	'000000000000000000000000000000000000000001000000000000000000000000000000'
Host	13	49	4	'000000000000000000000000000000000000000000000000000000000000000000000900'
Host	13	50	4	'000000000000001000000000000000000100000000000000000000000000000000000000'
Host	13	51	4	'000000000000001000000000000000000000000000000000010000000000000000000000'
Host	13	52	4	'000000000000001000000000000000000000000000000000000000001000000000000000'
Host	13	53	4	'000000000000000000000009000000000000000000000000010000000000000000000000'
Host	13	54	3	'000000000000000000000000010000000000000000000000000000000000000000000000'
Host	13	55	3	'000000000000000000000000000000000000000000000000000100000000000000000000'
Host	13	56	3	'000000000000000000000000000000000000000010000000000000000000000000000000'
Host	13	57	3	'000000000000000000000000000000000000000000000000000000010000000000000000'
Host	13	58	3	'000000000000000000000000000000000000000000000000100000000000000000000000'
Host	13	59	3	'000000000000000100000000000000000000000000000000000000000000000000000000'
Host	13	60	3	'000000000000000000000000000000000000000000000000000000000000010000000000'
Host	13	61	3	'020000000000000000000000000000000000000000000000000000001000000000000000'
Host	13	62	3	'000000000000000000000000000000000000000000900000000000000000000000000000'
Host	13	63	3	'000000000000000000000000000000000100000000000000000000000100000000000000'
Host	13	64	3	'020000000000000000000009000000000000000000000000000000000000000000000000'
Host	13	65	3	'000000000000000000000000000900000000000000000000001000000000000000000000'
Host	13	66	3	'000000000000001000000000000000000100000000000000001000000000000000000000'
Host	13	67	3	'000000001101000000000010001010000011000010000000000010000100000000000000'
Host	13	68	3	'000000000000000000000000000000000100000000000000010000001000000000000000'
Host	13	69	3	'000000000000000000000000000000000100000000000000000000009000000000000000'
Host	13	70	3	'020000000000000000000000000000000100000000000000001000000000000000000000'
Host	13	71	3	'000000000000000000000000000000000000900000000000000000000000000000000000'
Host	13	72	3	'020000000000000000000000000000000000000000000000000000009000000000000000'
Host	13	73	2	'000000001000000000000000000000000000000000000000000000000000000000000000'
Host	13	74	2	'000000000000000000000000000100000000000000000000000000000000000000000000'
Host	13	75	2	'001000000000000000000000000000000000000000000000000000000000000000000000'
Host	13	76	2	'000000000000000000200000000000000000000000000000000000000000000000000000'
Host	13	77	2	'000000000000000000000000000000000000000020000000000000000000000000000000'
Host	13	78	2	'010000000000000000000000000000000000000000000000000000000000000000000000'
Host	13	79	2	'000000000000000000000000000000000000000000000000000000000000000000090000'
Host	13	80	2	'000000000000000000001000000000000000000000000000000000000000000000000000'
Host	13	81	2	'000000000000000009000000000000000000000000000000000000000000000000000000'
Host	13	82	2	'000000000000010000000000000000000000000000000000000000000000000000000000'
Host	13	83	2	'000000000001000000000000000000000000000000000000000000000000000000000000'
Host	13	84	2	'000000000000000000000000000090000000000000000000000000000000000000000000'
Host	13	85	2	'000000000000090000000000000000000000000000000000000000000000000000000000'
Host	13	86	2	'000000000000000000000900000000000000000000000000000000000000000000000000'
Host	13	87	2	'000000000000000000000000000000000000000000000000000000900000000000000000'
Host	13	88	2	'000000000090000000000000000000000000000000000000000000000000000000000000'
Host	13	89	2	'000000000000000000000000000000000000000000000010001000000000000000000000'
Host	13	90	2	'000000101000000000000000000010000000000000000000000000000100000000000000'
Host	13	91	2	'000000000000000000000000000000000900000000000000000000001000000000000000'
Host	13	92	2	'000000000000000000000000000000000000000000000000000000000000000000100000'
Host	13	93	2	'000000000000000000000000000000000000000000000010000000001000000000000000'
Host	13	94	2	'000000000000000000000000000900000000000000000000000000001000000000000000'
Host	13	95	2	'000000000000000000000000000000010000000000000000001000000000000000000000'
Host	13	96	2	'000000000000000000000000000000000900000000000000001000000000000000000000'
Host	13	97	2	'000000001101000000000010001010000001000010000000000010000100000000000000'
Host	13	98	2	'000000000000000000000009000000010000000000000000001000000000000000000000'
Host	13	99	2	'000000000000000000000009000000000100000000000000001000000000000000000000'
Host	13	100	2	'020000000000000000000000000000000000000000000000001000009000000000000000'
Host	13	101	2	'000000000000000000000000000000000000000000000000901001000000000000000000'
Host	13	102	2	'000000000000000000000000000000000000000000000000901000000000000000000000'
Host	13	103	2	'000000000000000000000000000000000000000000090000000000000000000000000000'
Host	13	104	2	'000000000000000000000000000000000100000900000000000000000000000000000000'
Host	13	105	2	'020000000000000000000000000000000000000000000000001000001000000000000000'
Host	13	106	2	'000000000000000000000000000000000000000009000000010000000000000000000000'
Host	13	107	2	'000000000000000000000000000000000000000000000000009000009000000000000000'
Host	13	108	2	'000000000000000000000000000000000000000000009000000000000000000000000000'
Host	13	109	2	'000000000000000000000000000000000000000000000000000000000009000000000000'
Host	13	110	2	'000000000000000000009000000000000000000000000000001000000000000000000000'
Host	13	111	2	'000000000000000000000000000000000000000000000000901000000000000000009000'
Host	13	112	1	'000000000000000000000000000000000000000000000000000000000000000000000001'
Host	13	113	1	'000000000000000000200000000000000000100000000000000000000000000000000000'
Host	13	114	1	'000000100000000000000000000000000000000000000000000000000000000000000000'
Host	13	115	1	'000000000000000000000000000000000000000000000000000000000000000100000000'
Host	13	116	1	'000000000000000000000000000000000000000100000000000000000000000000000000'
Host	13	117	1	'000900000000000000000000000000000000000000000000000000000000000000000000'
Host	13	118	1	'000000000100000000000000000000000000000000000000000000000000000000000000'
Host	13	119	1	'000000000000000000000000000000000000000000000000100000000011000000000000'
Host	13	120	1	000000001101000000000010001010000010000000000000000000000000000000000000'
Host	13	121	1	'000000000101000000000010001010000011000010000000000000000000000000000000'
Host	13	122	1	'000000001101000000000000001010000000000000000000000000000000000000000000'
Host	13	123	1	110001001000000000000000000000000000000000000000000000000000000000000000'
Host	13	124	1	'000000000000000000000001000000000000000000000000000000000000000000000000'
Host	13	125	1	'000000000000090000000000000000000000000010000000000000000000000000000000'
Host	13	126	1	'000000000000000000000000000000000000090000000000000000000000000000000000'
Host	13	127	1	'000000000000000000000000000000000000000000000000000000000001000000000000'
Host	13	128	1	'000000000000000000000000000000000000000000001000000000001000000000000000'
Host	13	129	1	'000000000000000000900000000000000000000000000000000000000000000000000000'
Host	13	130	1	'000000000000000000000000000000000100000100000000000000000000000000000000'
Host	13	131	1	'000000000000000000000000000000000100000000000000000000000000009000000000'
Host	13	132	1	'000000000000000000000000000000000000000000000000001000000000009000000000'
Host	13	133	1	'000000000000000000200009000000000000000000000000000000000000000000000000'
Host	13	134	1	'000000000000000000000009000000000000001000000000000000000000000000000000'
Host	13	135	1	'120000000000000000000000000000000000000000000000000000000000000000000000'
Host	13	136	1	'000000000000000000000000000000000000000000000000010000000000000900000000'
Host	13	137	1	'020000000000000000010000000000000000000000000000000000000000000000000000'
Host	13	138	1	'000000000000000000000000000000000000010000000000000000000100000000000000'
Host	13	139	1	'000000000000000000000000000000000000010000000000000000000000000000000000'
Host	13	140	1	'001000000000000000000000000000000000000000000000010000000000000000000000'
Host	13	141	1	'000000000000009000000000001000000000000000000000010000000000000000000000'
Host	13	142	1	'000000000000000010000000000000000000000000000000000000000000000000000000'
Host	13	143	1	'000000000000000000000000000000000000000000000100001000000000000000000000'
Host	13	144	1	'000000000000000000000000000000000000000000000000001000000000000000100000'
Host	13	145	1	'000000000000000090000000000000000000000000000000001000000000000000000000'
Host	13	146	1	'000000000000000000000001000000000000000000000000001000000000000000000000'
Host	13	147	1	'000000000000000000000000000090000100000000000000000000000000000000000000'
Host	13	148	1	'000000000000000001000000000000000000000000000000000000000000000000000000'
Host	13	149	1	'000000000000000000000000000000000000000090000000000000000000000000000000'
Host	13	150	1	'001000000100000000000000000000000000000000000000000000000000000000000000'
Host	13	151	1	'000000000000000000000000000000000000000900000000000000000000000000000000'
Host	13	152	1	'000000000000000000000000000000000000000000900000000000090000000000000000'
Host	13	153	1	'000000000000000000000000000000000000009000000000000000000000000000000000'
Host	13	154	1	'000100000000000000000000000000000000000000000000000000000000000000000000'
Host	13	155	1	'000000000000001000000000000000000100090000000000000000000000000000000000'
Host	13	156	1	'000000000000000000000000000000000000000000000000000000001000000900000000'
Host	13	157	1	'000000000000000000000000000000000000000000000000000000000000000010000000'
Host	13	158	1	'000000000000000000000000000000000100000000000000100000009000000000000000'
Host	13	159	1	'000000001000000000000000000010000000000000000000000000000100000000000000'
Host	13	160	1	'000000001000010000000000000010000000010000000000000000000100000000000000'
Host	13	161	1	'000100000000000000000000000000000000000000000000000000000100000000000000'
Host	13	162	1	'000000001000010000000000000010000000000010000000000010000100000000000000'
Host	13	163	1	'000000000000000000000010000000000000000000000000001000001000000000000000'
Host	13	164	1	'000000000000000000000000000000000000000000010000010000000000000000000000'
Host	13	165	1	'000000000000000000000000000000000000000000000900000000000000000000000000'
Host	13	166	1	'000000000000000000000000000010000000000000000000000000000100000000000000'
Host	13	167	1	'000000000000000000000000000000000000000000000000100000001000000000000000'
Host	13	168	1	'000000001000000000000000000010000000000000000000010000000100000000000000'
Host	13	169	1	'000000000000000000000000000000000000000000000000001000009000000000000000'
Host	13	170	1	'000000000000000000000000000000000000000000000000001000900000000000000000'
Host	13	171	1	'000000000000000000000000000000000000000000000000001000000009000000000000'
Host	13	172	1	'000000000000000000000000000000000000000000000000000090000000000000000000'
Host	13	173	1	'000001000000000000000000000000000000000000000000000000000000000000000000'
Host	13	174	1	'000000000000000000000000000000000900000000000000001000001000000000000000'
Host	13	175	1	'000000000000000000000000000000000100000000000000011000001000000000000000'
Host	13	176	1	'000000000000000000000000000000010100000000000000001000000000000000000000'
Host	13	177	1	'000000000000009000000000000000000000000000000000001000000000000000000000'
Host	13	178	1	'000000000000000000000000000000000100000000000000011000000000000000000000'
Host	13	179	1	'000009000000000000000000000000000000000000000000000000000000000000000000'
Host	13	180	1	'000000000000001000000009000000000000000000000000000000000000000000000000'
Host	13	181	1	'000090000000090000000000000000000000000000000000000000000000000000000000'
Host	13	182	1	'000000000000000000000000000000000000000900000000011000000000000000000000'
Host	13	183	1	'000000000000000000000000000000000000001900000000010000000000000000000000'
Host	13	184	1	'000000001101000009000010001010000011000010000010000010000100000000000000'
Host	13	185	1	'020000000000001000000000000000000000000000000000000000000000000000000000'
Host	13	186	1	'000000000000001000000000000000000100000000000000000000001000000000000000'
Host	13	187	1	'000000000000000000000000000000000010000000000000000000000000000000000000'
Host	13	188	1	'009000000000000000000000000000000000000000000000000000000000000000000000'
Host	13	189	1	'000000010000000000000000000000000000000000000000001000001000000000000000'
Host	13	190	1	'000000000000000000000000000000000100001000000000000000000000000000000000'
Host	13	191	1	'000000101100010000000000000000000000010020000000000000000100000000000000'
Host	13	192	1	'000000000000000000100000000000000000000000000000000000009000000000000000'
Host	13	193	1	'000000000000000000000000000000010100010000000000000000000000000000000000'
Host	13	194	1	'000000000000000000000000000000000000000000000000000000000000000190000000'
Host	13	195	1	'000000001000000000000000011010000000000000000000000000000100001000000000'
Host	13	196	1	'020000000000000000000000000000000900000000000000000000000000000000000000'
Host	13	197	1	'000000000000000000000000090090000000000000000000000000001000001000000000'
Host	13	198	1	'000000000000000000000000000000000100000000000000000000901000000000000000'
Host	13	199	1	'000000000000000000000009000000000000000000000000900000000000000000000000'
Host	13	200	1	'000000001000000000000000000000000000000000000000000000001000000000000000'
Host	13	201	1	'000000000000000000000000000000000000000000000000000000001009000000000000'
Host	13	202	1	'000000000000000000000000000000000000000000000000910000000000000000000000'
Host	13	203	1	'000000000000000000000009000000000000000000000000001000001000000000000000'
Host	13	204	1	'000000000000000000000000000000000000000001000000011000000000000000000000'
Host	13	205	1	'000000000000000000000000000000000000000000000000000000000000000000001000'
Host	13	206	1	'000000000000001000000000000000000000000000000000000000009000000000000000'
Host	13	207	1	'020000000000001000000000000000000100000000000000001000001000000000000000'
Host	13	208	1	'000000000000001000000000000000000000000000000000001000001000000000000000'
Host	13	209	1	'000000000000000000000000090000000100000000000000000000001000000000000000'
Host	13	210	1	'000000000000000000000000000000000000000000000000010090000000000000000000'
Host	13	211	1	'000000001101000000000010001010000001000010000000010010001100000000000000'
Host	13	212	1	'000000000000000000100000000000000000000000000000000000001000000000000000'
Host	13	213	1	'000000000000000000000000000009000000000000000000001000000000000000000000'
Host	13	214	1	'000000000000010000000000000000000000000000000000001000000000000000000000'
Host	13	215	1	'000000000000000000000000000000090000000000000000001000000000000000000000'
Host	13	216	1	'000000000000000000000000000000010100000000000000910000000000000000000000'
Host	13	217	1	'000000000000000000000000000000000100000000000000900000000000000000000000'
Host	13	218	1	'020000000000000000000000000000000000000000000000011000009000000000000000'
Host	13	219	1	'000000000000000000000000000000000000000010000000011000000000000000000000'
Host	13	220	1	'000000000000000000000000000900000000000000000000010000000000000000000000'
Host	13	221	1	'000000000000000000000900000000000000000000000000010000000000000000000000'
Host	13	222	1	'000000000000000000000000000000000000000000000000911000001000000000000000'
Host	13	223	1	'020000000000000000000009000000000100000000000000000000000000000000000000'
Host	13	224	1	'020000000000000000009000000000000000000000000000000000000000000000000000'
Host	13	225	1	'000000000000000000000000000000000000000000000100000000009000000000000000'
Host	13	226	1	'000000000000000000000000000000000000000090000000001000000000000000000000'
Host	13	227	1	'000000000000000000000000009000000000000000000000001000000000000000000000'
Host	13	228	1	'000000000000000000000009000000000000000000000000010000009000000000000000'
Host	13	229	1	'000000000000000000000000000090000100000000000000000000001000000000000000'
Host	13	230	1	'000000000000001000009000000000000000000000000000000000001000000000000000'
Host	13	231	1	'000000000000000000009000000000000000000000000000000000001000000000000000'
Host	13	232	1	'010000000000000000000000000000000100000000000000000000000000000000000000'
Host	13	233	1	'000000000000000000000000000000000000000000000000000000000009000900000000'
Host	13	234	1	'020000000000000000000000000000000000000000000000901000000000000000000000'
Host	13	235	1	'000000000000000000000000000000000100000000000100001000000000000000000000'
Host	13	236	1	'000000000000000000000000000010000000000000000000009000000000000000000000'
Host	13	237	1	'000000000000000000000000000010000000000000000000000000001000000000000000'
Host	13	238	1	'000000101000000000000000000010000000000000000000000000000000000000000000'
Host	13	239	1	'000000000000000000000000000000000100000000000900001000000000000000000000'
Host	13	240	1	'000000000000000000000000000000000100000000000000000000000000000000010000'
Host	13	241	1	'000000000000000000000000000000000000000000000000001000000001000000000000'
Host	13	242	1	'000000000000000000000000000000000000000000000000900000009000000000000000'
Host	13	243	1	'000000000000000000000000000000000000000000000000010000009000000000000000'
Host	13	244	1	'000000000001000000000009000000000000000000000000000000000000000000000000'
Host	13	245	1	'020000000000000000000000090000000000000000000000000000000000000000000000'
Host	13	246	1	'000000000000000000000000000000000100000000000000000000000009000000000000'
Host	13	247	1	'000000000000000001000000000000000000000000000000001000000000000000000000'
Host	13	248	1	'000000000000000000000000000000000000000000000001000000000000000000000000'
Host	13	249	1	'020000000000000000000000000000000000000009000000000000000000000000000000'
Host	13	250	1	'000000000000000000000000000000000100000000000000900000001000000000000000'
Host	13	251	1	'000000000000000000000000000000000100010000000000010000000000000000000000'
Host	13	252	1	'000000001000000000000010009010000110000090000000011000900000000000000000'
Host	13	253	1	'000000001000010000000000000010000000010090000000011000001100000000000000'
Host	13	254	1	'000000001100010000000000000000000000000000000000000000000000000000000000'
Host	13	255	1	'000000000000000000009000000000000000000000000010000000000000000000000000'
Host	13	256	1	'000000000000000000200000000000000100000000000000000000000000000000000000'
Host	13	257	1	'020000000000000000000000000010000000000000000000000000000000000000001000'
Host	13	258	1	'001900000000000000000000000000000000000000000000000010000000000000000000'
Host	13	259	1	'000000000000000000000000000000000100000000000100000000000000000000000000'
Host	13	260	1	'000000000000000000000009000000000000000000000000000000001000000000000900'
Host	13	261	1	'000000000000000000000000000000000100000000000000001010009000000000000000'
Host	13	262	1	'000000000000000000000000000000000000010000000000001000000000000000000000'
Host	13	263	1	'000000000000090000000000000000000100000000000000001000000000000000000000'
Host	13	264	1	'000000000000090000000000000000000100000000000000000000000000000000000000'
Host	13	265	1	'000000000000090000000009000900000100000000000000001000000000000000000000'
Host	13	266	1	'000000000000000000000009000000000100000000000000010000000000000000000000'
Host	13	267	1	'000000000000001090000000000000000000000000000000001000000000009000000000'
Host	13	268	1	'000000000000000000000000000000000000000000000000001000001009000000000000'
Host	13	269	1	'000000000000000000000000000000000000000000000000000000000090000000000000'
Host	13	270	1	'020000000000000000000000000000000100000000000000000000001000000000000000'
Host	13	271	1	'000000000000000000000000000000000100000000000000901000000000000000000000'
Host	13	272	1	'000000000000000000000000000000000000000000000000901000000000000000001000'
Host	13	273	1	'020000000000000000000000000001000000000000000000000000009000000000000000'
Host	13	274	1	'000000900000000000000000000000000100000000000000000000000000000000000000'
Host	13	275	1	'020000000000000000000000000000000100000000000000010000000000000000000000'
Host	13	276	1	'000000000000000000000001000000000000000000000010000000000000000000000000'
Host	13	277	1	'000000000000000000000000000000000100000000000010000000000000000000000000'
Host	13	278	1	'000000000000001000000000000000000000000000000000001000000100000000000000'
Host	13	279	1	'000000000000001000000009000000000000000000000000000000001000000000000000'
Host	13	280	1	'000000001101000000000000000001000000000000000000000000001000000000000000'
Host	13	281	1	'000000001101000000000000000000000000000000000900000000001010000000000000'
Host	13	282	1	'020000000000000000000009000000000000000000000000000000001000000000000000'
Host	13	283	1	'000000000000001000000009000000000000000000000000000000000000000000010000'
Host	13	284	1	'000000000000000000009000000000000000000000000000010000000000000000000000'
Host	13	285	1	'000000009000000000000000000090000000000000000000000000000000000000000000'
Host	13	286	1	'020000000000000000000000000000000000000000000000001000000009000000000000'
Host	13	287	1	'000000001000000000000000000010000000010000000000000000001100000000000000'
Host	13	288	1	'000001000000000000000000000000000100000000000000000000000000000000000000'
Host	13	289	1	'000000000000001000000000090000000000000000000000000000000000000000000000'
Host	13	290	1	'000000000000000000000010000000000000000000000000010000000000000000000000'
Host	13	291	1	'000000000000000000000000000000000000000100000000000000001000000000000000'
Host	13	292	1	'000000101100010000000000000010000000010000000000000000000000000010000000'
Host	13	293	1	'000000000000000000000000000001000000000090000000000000000000000000000000'
Host	13	294	1	'000000000000001000000000000000000000000000009000001000000000000000000000'
Host	13	295	1	'000000000000001000000000000000000000000000009000000000000000000000000000'
Host	13	296	1	'000000000000000000000000000901000000000000000000000000000000000100000000'
Host	13	297	1	'020000000000000000000000000900000000000000000000000000000000000000000000'
Host	13	298	1	'000000000000001000000000000000000000000000000000010000001000000000000000'
Host	13	299	1	'000000000000000000000000000000000000000000000000001000001000000000001000'
Host	13	300	1	'000000000000000000000000000000000900000000000000000000001009000000000000'
Host	13	301	1	'000000900000000000000000000000000900000000000000000000000000000000000000'
Host	13	302	1	'000000000000000000000000000000000100000000000000000000000000000000000900'
Host	13	303	1	'000000000000000000000000000000000100000000000000000009000000000000000000'
Host	13	304	1	'000000000000000000000000000000000100000000000000000000900000000000000000'
Host	13	305	1	'001000000000000000000000000000000100000000000000000000000000000000000000'
Host	13	306	1	'000000000000000000000000000000000100000000000000009000009000000000000000'
Host	13	307	1	'000000000000000000000000090000000100000000000000000000000000000000100000'
Host	13	308	1	'000000000000000000000000000000000100000090000000900000000000000000000000'
Host	13	309	1	'000000000000001000000000000000000100000090000000000000001000000000000000'
Host	13	310	1	'000000000000000000000000000900000000000000000000000000009000000000000000'
Host	13	311	1	'000000000000000000000000000000000100900000000000000009009000000000000000'
Host	13	312	1	'000000000000000000000000000000000000000000000000000001001000000000000000'
Host	13	313	1	'000000000000000000000000000901000000000000000000000000000000000000000000'
Host	13	314	1	'000000000000001000000000000900000000000000000000000000009000000000000000'
Host	13	315	1	'000000000000000000000000009000000000000000000000010000000009000000000000'
Host	13	316	1	'000000000000000000000000000000000000000000000000091000000000000000000000'
Host	13	317	1	'000000000000000000000000000010000000000000000000000000000000000000000000'
Host	13	318	1	'000090000000000000000000000000000000000000000000000000000000000000000000'
Host	13	319	1	'000000000000000000000009000000000000000000000000000990001000000000000000'
Host	13	320	1	'000000000000001000000000090000000100000000000000000000000000000000000000'
Host	13	321	1	'000000000000000000000000900000000000000000000000000000000000000000000000'
Host	13	322	1	'000000000000000000000000000009010000900000000000000000000000000000000000'
Host	13	323	1	'000000000000000000000000100000000000000000000000000000000000000000000000'
Host	13	324	1	'000000000000000000000000000000000000900000000000001000001000000000000000'
Host	13	325	1	'000000000000001000000000000000000000900000000000000000000000000000000000'
Host	13	326	1	'000000000000000000000000000000000000000000000000000000000000000000000009'
Host	13	327	1	'000000000000000000000000000000000000000000000000909000000000000000000000'
Host	13	328	1	'000000000000000000000000000000000000000000000000900000001000000000000000'
Host	13	329	1	'020000000000000000000000090000000000000000000000001000009000000000000000'
Host	13	330	1	'000000000000000000000900000000000000000000000000000000000000000000090000'
Host	13	331	1	'020000000000000000000000000000000100000000000000000000000000900000000000'
Host	13	332	1	'000000000000001000000000000000000000000000000000001000009000000000000000'
Host	13	333	1	'000000000000000000000009000001000000000000000000000000000000000000000000'
Host	13	334	1	'000000000090000000000009000000000000000000000000001000000000000000000000'
Host	13	335	1	'000000000000000000000000000000000000000000000000990000000009000000000000'
Host	13	336	1	'000000000000000000000000000000000000000000901000000000000000000000000000'
Host	13	337	1	'020010000000000000000000000000000000000000900000000000900000000000000000'
Host	13	338	1	'009000000000001000000000009000000100000000000000000000000000000000000000'
Host	13	339	1	'000000000000000000000000000000000000000000000000090000009000000000000000'
Host	13	340	1	'000000000190000000000000000000000000000000000000000000009000000000000000'
Host	13	341	1	'020000900000090000000000000000000000000000000000000000000000000000000000'
Host	13	342	1	'000000000000090000000000000000000000900000000000001000000000000000000000'
Host	13	343	1	'000090000000000000000000000000000000000000000000000001000000000000000009'
Host	13	344	1	'000000000000000000000000090000000090000000000000000000000000000000000000'
Host	13	345	1	'020000000000000000000000000000000000000000000000900000000000000000000000'
Host	13	346	1	'020009000000000000000000000000000000000000000000000000000000000000000000'
Host	13	347	1	'110000000000000000000000000000000000000000000000000000000000000000000000'
Host	13	348	1	'000000000000000000000000000000000090000000009000000000000000000000000000'
Host	13	349	1	'000000000000000000000000000900010000000000000000000000000000000000000000'
Host	13	350	1	'000000000000000000000009000010009000000000000000000000000000000000000000'
Host	13	351	1	'020000000000000000000000000000000000000000009000000000000000000000000000'
Host	13	352	1	'000000000000000000000009000000000000000000000000090000000000000000000000'
Host	13	353	1	'000000000000001000000000000000000100010000000000000000000000000000000000'
Host	13	354	1	'000000000000000000000009000000000000000000000000000000001000000000900000'
Host	13	355	1	'000000000901000000190000000000000000000000000000000000000000000000000000'
Host	13	356	1	'000000000000000000000000000000000000000000000000001000000000010000000000'
Host	13	357	1	'020000000000000000000009000000000000000000009000000000000000000000000000'
Host	13	358	1	'020000000000000000000000000000000000000000000000000000000000000100000000'
Host	13	359	1	'000000000000091000000000000000000000000000000000000000000000000000000000'
Host	13	360	1	'000000000000090000000000000000000000000000000000901000000000000000000000'
Host	13	361	1	'000000900000000000000000000000000100000000000000090000000000000000000000'
Host	13	362	1	'000000000000000000001000009000000000000000000000000000000000000000009000'
Host	13	363	1	'000000000000000000000009000000000000000000000000000000000000900000000000'
Host	13	364	1	'020001000000090000090000000000000000000000000000090000010000000000009000'
Host	13	365	1	'000000000000090000000009000000000000000000900000000000000000000000000000'
Host	13	366	1	'021000000000000000000000000000000000000000000900000001000000000000000000'
Host	13	367	1	'000000900000000000000019000000000000000900000000000000000000000000000000'
Host	13	368	1	'000000000000090900000000000000000000900000900000000000000000000000000000'
Host	13	369	1	'020000000900000000000000000000000090000000000000000000000000000000000000'
Host	24	1	381	'000000000001000000000000000000000000000000000000000000000001000000000000'
Host	24	2	36	'000000000001000000000000000000000000000000000000000000001001000000000000'
Host	24	3	31	'000000000001000000000000000000000000000000000000001000000001000000000000'
Host	24	4	14	'000000000001000000000000000000000100000000000000000000000001000000000000'
Host	24	5	8	'000000000001001000000000000000000000000000000000000000000001000000000000'
Host	24	6	7	'000000000001000000000000000000000000000000000000001000001001000000000000'
Host	24	7	6	'000000000001000000000000000001000000000000000000000000000001000000000000'
Host	24	8	6	'000000000001000000000000000000000100000000000000001000000001000000000000'
Host	24	9	5	'000000000001000000000000000010000000000000000000000000000001000000000000'
Host	24	10	5	'000000000001000000000000000000000000000000000000010000000001000000000000'
Host	24	11	4	'000000000001000000000000000000000000000000000000000010000001000000000000'
Host	24	12	4	'000000000001000000000009000000000000000000000000000000000001000000000000'
Host	24	13	4	'000000000001000000000000000000000100000000000000000000001001000000000000'
Host	24	14	3	'000000000001000000000000000000010000000000000000000000000001000000000000'
Host	24	15	3	'020000000001000000000000000000000000000000000000000000000001000000000000'
Host	24	16	2	'000000000001000000000000000000000000000000000000000000000001010000000000'
Host	24	17	2	'000000000001000000000000000000000000000000010000000000000001000000000000'
Host	24	18	2	'000000000001000000000000000000000000000000000000090000000001000000000000'
Host	24	19	2	'000000000001000000000000000000000000000000000000000000000000000000000000'
Host	24	20	2	'000000000001000000000000000000000000000000000000000000900001000000000000'
Host	24	21	2	'000000000001010000000000000000000000000000000000000000000001000000000000'
Host	24	22	2	'020000000001000000000000000000000100000000000000000000000001000000000000'
Host	24	23	2	'000000000001001000000000000000000000000000000000000000001001000000000000'
Host	24	24	2	'020000000001000000000000000000000100000000000000001000001001000000000000'
Host	24	25	2	'000000000001000000000000000001000100000000000000000000000001000000000000'
Host	24	26	2	'020000000001000000000000000000000000000000000000000000001001000000000000'
Host	24	27	2	'000000000001000000000000900000000000000000000000000000000001000000000000'
Host	24	28	1	'000000000001000000000000000000000000000000000000009000000001000000000000'
Host	24	29	1	'000000000001000000000000000000000000000000000000000000000001000010000000'
Host	24	30	1	'000000000001000000000000000000000000000000000000100000000001000000000000'
Host	24	31	1	'000000000001000000000000000000000000000000100000000000000001000000000000'
Host	24	32	1	'000000000001000000000000001000000000000000000000000000000001000000000000'
Host	24	33	1	'000001009001000000000000000000000000000000000000000000000001000000000000'
Host	24	34	1	'000100000001000000000000000000000000000000000000000000000001000000000000'
Host	24	35	1	'000000010001000000000000000000000000000000000000000000000001000000000000'
Host	24	36	1	'000100000001000000000000001000000000000000000000000000000001000000000000'
Host	24	37	1	'000090000001001000000000000000000000000000000000000000000001000000000000'
Host	24	38	1	'000000001001000000000000000000000000000000000000001000000001000000000000'
Host	24	39	1	'000090000001000000000000000000000000000000000000010000000001000000000000'
Host	24	40	1	'000000000001000000000000000100000000000000000000000000000001000000000000'
Host	24	41	1	'000000000001000000000000000000000000000000000000000000000001000900000000'
Host	24	42	1	'000000000001000000000000000000000000000000900000000000000001000000000000'
Host	24	43	1	'000000001001000000000000000000000000000000000000000000000001000000000000'
Host	24	44	1	'000000000001000000000000000000000000000900000000009000000001000000000000'
Host	24	45	1	'000000000001000000000000000000000000000000000000000000000001000090000000'
Host	24	46	1	'000000000001000000100000000000000000000000000000000000000001000000000000'
Host	24	47	1	'000000000101000000000000000000000000000000000000000000000001000000000000'
Host	24	48	1	'020000000101000000000000000000000000000000000000000000000001000000000000'
Host	24	49	1	'000000000001001000000000000000000100000000000000000000001001000000000000'
Host	24	50	1	'000000000001000000000000000000000000000000000000010000001001000000000000'
Host	24	51	1	'000000000001000000000000000000000000000000000900000000001001000000000000'
Host	24	52	1	'009000000001000000000000000000000000000000000000000000000001000000000000'
Host	24	53	1	'000000000001000000200000000000000100000000000000000000000001000000000000'
Host	24	54	1	'000000000001000000000000000000000100000000000000001000001001000000000000'
Host	24	55	1	'000000000001000000000000000901000100000000000000000010000001000000000000'
Host	24	56	1	'000000000001001000000000000000000100000000000000000000000001000000000000'
Host	24	57	1	'000000000001090000000000000000000100000000000000000000000001000000000000'
Host	24	58	1	'000000000001000000000000000000000010000000000000000000000001000000000000'
Host	24	59	1	'000000000001000000000000000000000000000000000900000000000001000000000000'
Host	24	60	1	'000000000001000000000000000000000000001000000000000000000001000000000000'
Host	24	61	1	'000000000001000000000000000000000000000000000000901000000001000000000000'
Host	24	62	1	'000000000001000000000000000000000100090000000000001000000001000000000000'
Host	24	63	1	'000000000001001000000000000000000000000000000000001000001001000000000000'
Host	24	64	1	'000000000001000000000000000900000000000000000000001000000001010000000000'
Host	24	65	1	'020000000001000000000009000000000000000000000000001000001001000000000000'
Host	24	66	1	'020000000001000000000000000000000000000000000000010000000001000000000000'
Host	24	67	1	'000000000001000000000000000000000100000000000000010000001001000000000000'
Host	24	68	1	'000000000001000000000000000009000000000000000000000000000001000000000000'
Host	24	69	1	'000000000001000000000000000000000001000000000000000000000001000000000000'
Host	24	70	1	'000000000001001000000000000000000000000000000000901000000001000000000000'
Host	24	71	1	'020000000001000000000000000001000000000000000000000000000001000000000000'
Host	24	72	1	'000000000001000000000000000000000000000000000000000000000001100000000000'
Host	24	73	1	'000000000001000000000000000009000000000000000000000000001001000000000000'
Host	24	74	1	'000000000001000000000000000000000000000000000000000000000101000000000000'
Host	24	75	1	'020000000001000000000000000000000000000000000000010000001001000000000000'
Host	24	76	1	'000000000001000000000000000000000000090000000000001000000001000000000000'
Host	24	77	1	'000000000001001009000000000000000100000000000000000000009001000000000000'
Host	24	78	1	'000000000001000000000000000000000100000000000000000000009001000000000000'
Host	24	79	1	'000000000001090000000000000000000100000000000000001000000001000000000000'
Host	24	80	1	'000000000001000000000000000010000000000000000000001000000001000000000000'
Host	24	81	1	'000000000001000000000000000000000000000000000000001000000001000000001000'
Host	24	82	1	'000000000001000000000000000000000000000000000000000000001001900000000000'
Host	24	83	1	'000000000001000000000009000000000000000000000000090000000001000000000000'
Host	24	84	1	'000000000001000000000000000000000000000100000000000000000001000000000000'
Host	24	85	1	'000000000001000000000000000001000000090000000000000000001001000000000000'
Host	24	86	1	'020000000001000000009000000000000100000000000000001000000001000000000000'
Host	24	87	1	'020000000001000000000000000000000900000000000000000000000001000000000000'
Host	24	88	1	'001900000001000000009000000000000000000000000000000000001001000000000000'
Host	24	89	1	'000000000001000000000000000000000100000000001000000000000001000000000000'
Host	24	90	1	'000000000001000000009000000000000000000000000000001000000001000000000000'
Host	24	91	1	'000000000001000000090000000009000000000000000000000900000001000000000000'
Host	33	1	286	'000000001000000000000000000010000000000000000000000000000100000000000000'
Host	33	2	145	'000000000000000000000000000010000000000000000000000000000100000000000000'
Host	33	3	32	'000000001000000000000000000010000000000000000000001000000100000000000000'
Host	33	4	22	'000000001000000000000000000010000000000000000000000000001100000000000000'
Host	33	5	18	'000000000000000000000000000010000000000000000000001000000100000000000000'
Host	33	6	14	'000000001000000000000000000010000100000000000000000000000100000000000000'
Host	33	7	10	'000000000000000000000000000010000000000000000000000000001100000000000000'
Host	33	8	8	'000000009000000000000000000010000000000000000000000000000100000000000000'
Host	33	9	8	'000000000000000000000000000010000000000000000000001000001100000000000000'
Host	33	10	7	'000000000000000000000000001010000000000000000000000000000100000000000000'
Host	33	11	7	'000000000000000000000000000010000100000000000000000000000100000000000000'
Host	33	12	7	'000000001000000000000000000010000000000000000000010000000100000000000000'
Host	33	13	6	'000000001000000000000000001010000000000000000000000000000100000000000000'
Host	33	14	6	'000000000000001000000000000010000000000000000000000000000100000000000000'
Host	33	15	5	'000000001000000000000000000010000000000000000000001000001100000000000000'
Host	33	16	5	'000000001000000000000000000010000100000000000000000000001100000000000000'
Host	33	17	4	'020000000000000000000000000010000000000000000000000000000100000000000000'
Host	33	18	4	'020000001000000000000000000010000000000000000000000000000100000000000000'
Host	33	19	4	'000000001000000000000000000011000000000000000000000000000100000000000000'
Host	33	20	4	'000000001000000000000000000010000100000000000000001000000100000000000000'
Host	33	21	3	'000000001000000000000000000010000000000000000000000000000000000000000000'
Host	33	22	3	'000000001000000000000000000010000000000000000000000000000100100000000000'
Host	33	23	3	'000000000000000000000000000010000100000000000000001000000100000000000000'
Host	33	24	3	'000000001000000000000000000010000100000000000000001000001100000000000000'
Host	33	25	3	'000000000000000000000000000910000000000000000000000000000100000000000000'
Host	33	26	2	'000000001000000000000000000010010000000000000000000000000100000000000000'
Host	33	27	2	'000000000000001000000000000010000000000000000000001000000100000000000000'
Host	33	28	2	'000000001000001000000000000010000000000000000000000000000100000000000000'
Host	33	29	2	'000100000000000000000000000010000000000000000000000000000100000000000000'
Host	33	30	2	'000000001000000000000000000010000000000000000000010000001100000000000000'
Host	33	31	2	'020000001000000000000000000010000100000000000000000000000100000000000000'
Host	33	32	2	'000000001000000000009000000010000000000000000000000000000100000000000000'
Host	33	33	2	'000000000000000000000000000010000100000000000000000000001100000000000000'
Host	33	34	2	'000000001000000000000000000910000000000000000000000000000100000000000000'
Host	33	35	2	'000000001000000000000000010010000000000000000000000000000100000000000000'
Host	33	36	1	'000000000000000000000000000010000000000000000000000000000100100000000000'
Host	33	37	1	'000000001000000000000000000010000000000010000000000000000100000000000000'
Host	33	38	1	'000000001000000000000000000010000000000000000000000000000100010000000000'
Host	33	39	1	'000001001000000000000000000010000000000000000000000000000100000000000000'
Host	33	40	1	'000000001000000000000000000010000000000000000100000000000100000000000000'
Host	33	41	1	'000000000000000000001000000010000000000000000000000000000100000000000000'
Host	33	42	1	'000100001000000000000000000010000000000000000000000000000100000000000000'
Host	33	43	1	'000000000000000000000000000010000000000000000000010000000100000000000000'
Host	33	44	1	'000000000000000000000000000110000000000000000000010000000100000000000000'
Host	33	45	1	'000000000000000000000000000010000000000000000000011000000100000000000000'
Host	33	46	1	'000000001000000000000000000010000000009000000000000000000100000000000000'
Host	33	47	1	'000000000000000000000000000010000000000000000100000000000100000000000000'
Host	33	48	1	'000000000000000000000000009010000000000000000000000000000100000000000000'
Host	33	49	1	'000000001000000000000000000010000000000000000000900000000100000000000000'
Host	33	50	1	'000000001000000001000000000010000000000000000000000000000100000000000000'
Host	33	51	1	'000000000000000000000000000010000000000000000000000000000111000000000000'
Host	33	52	1	'000000000000000000009000000010000000000000000000000000000100000000000000'
Host	33	53	1	'001000001000000000000000000010000000000000000000001000000100000000000000'
Host	33	54	1	'000000001000000000000000000010000000000000000100001000000100000000000000'
Host	33	55	1	'000000000000000000000000000010000000000000000010000000000100000000000000'
Host	33	56	1	'000000001000000000000000000010000000000000900000000000000100000000000000'
Host	33	57	1	'000000000000000000000000000010000000000000900000000000000100000000000000'
Host	33	58	1	'000000001000000000000000001010000000000000000000000000001100000000000000'
Host	33	59	1	'020000000000000000000000000010000000000000000000001000000100000000000000'
Host	33	60	1	'000000001000000090000000001010000000000000000000000000000100000000000000'
Host	33	61	1	'000000001000000000000000000010000000001000000000000000000100000000000000'
Host	33	62	1	'000090001000000000000000000010000000000000000000000000000100000000000000'
Host	33	63	1	'000000000000000000000000000010000000000000000000000000000100001000000000'
Host	33	64	1	'020000000000000000000000000010000100000000000000010000001100000000000000'
Host	33	65	1	'000000001000000000000000000010000000000000000000000090000100000000000000'
Host	33	66	1	'000000001000000000000000000010000000000000000000000000009100000000000000'
Host	33	67	1	'000000000000000000000000000010000000000000000000000000000900000000000000'
Host	33	68	1	'000000001000000000000000000010000100000000000000000000000100010000000000'
Host	33	69	1	'000000000000000000000090000010000000000000000000000000000100000000000000'
Host	33	70	1	'000000000000000000000009000010000000000000000000000000000100000000000000'
Host	33	71	1	'000000000000000000000000000010000000001000000000000000001100000000000000'
Host	33	72	1	'000000000000000000000000000010000000000000000000009000001100000000000000'
Host	33	73	1	'000000001000000000000000000010000000000000000000009000001100000000000000'
Host	33	74	1	'000000001000000000000000000010000000000000000000100000000100000000000000'
Host	33	75	1	'020000000000000000000000000910000000000000000000000000000100000000000000'
Host	33	76	1	'020000000000001000001000000010000000000000000000000000000100000000000000'
Host	33	77	1	'000000001000000000000000000010000000009000000000001000000100000000000000'
Host	33	78	1	'000000001000000000000000000910000000000000000000001000001100000000000000'
Host	33	79	1	'000000001000000000000000009010000000000000000000001000000100000000000000'
Host	33	80	1	'020000001000000000000000000010000100000000000000001000001100000000000000'
Host	33	81	1	'000000000000000000000000000010000009000000000000000000000100000000000000'
Host	33	82	1	'000000000000001000000000000010000100000000000000000000000100000000000000'
Host	33	83	1	'000000000000000000000000000010000900000000000000000000000100000000000000'
Host	33	84	1	'000000001000000000000000000010000900000000000000000000000100000000000000'
Host	33	85	1	'000000000000000000000000001010000000000000000000001000000100000000000000'
Host	33	86	1	'000000001000000000000000000010000000000000000000010000001000000000000000'
Host	33	87	1	'000000000000000000009000000010000000000000000000001000000100000000000000'
Host	33	88	1	'000000000000000000000001000010000000000000000000000000000100000000000000'
Host	33	89	1	'020000000000000000000009000010000000000000000000000000000100000000000000'
Host	33	90	1	'000000001000000000000000000010000100009000000000001000000100000000000000'
Host	33	91	1	'000000011000000000000000001010000000000010000010100000010011100000000000'
Host	33	92	1	'000000001000000000000000000010000100000000000000000000009100000000000000'
Host	33	93	1	'000900001000000000009000000010000000900000000000000000000100000000000000'
Host	33	94	1	'000000001000000000000000000010000000000000000000000000000100000000100000'
Host	33	95	1	'000000001000090000000000000010000000000000000000000000000100000000000000'
Host	33	96	1	'000000001000090000000009000010000000000000000000001000000100000000000000'
Host	33	97	1	'000000000000000000000000000010000000000000000000001000001100000000001000'
Host	33	98	1	'000000000000000000000000000010000100000000000000001000001100000000000000'
Host	33	99	1	'000000009000000000000000001010000100000000000000000000001100000000000000'
Host	33	100	1	'000000009000000000000000000010000100000000000000000000001109000000000000'
Host	33	101	1	'000000000000000000000000000011000000000000000000000000000100000000000000'
Host	33	102	1	'000000001000000000000000000010000000000000000000000000001100000900000000'
Host	33	103	1	'000000001000000000000000000010000000000000000000000000000100001000000000'
Host	33	104	1	'000000001000000000000009000010000000000000000000001000900100000000000000'
Host	33	105	1	'000000001000000000000000000010000100000000000000000000000100000900000000'
Host	33	106	1	'000000001000000000000000000010000001000000000000001000001100000000000000'
Host	33	107	1	'000000000000000000000000001010000900000000000000000000000100000000000000'
Host	33	108	1	'020000001000000000000000000010000000000000000000000000001100000000000000'
Host	33	109	1	'000000001000000000000000000010000000000000000000000000900100000000000000'
Host	33	110	1	'020000001000009000000000001010000100000000000000010000000100000000000000'
Host	33	111	1	'000000000000009000000000000910000100000000000000001000000100000000000000'
Host	33	112	1	'000000010000000000000000000010000100000000000000000000000100000000000000'
Host	33	113	1	'000000001000009000000000000010000000000000000000001000000100000000000000'
Host	33	114	1	'000000001000000000000000000010000000000000000000000000000100900000000000'
Host	33	115	1	'000000001100000000000000000010000100000000000000000000000100000000000000'
Host	33	116	1	'000000000000000000009000000010000100000000000000000000000100000000000000'
Host	39	1	85	'000000000001000000000000000000000000000000000000100000000011000000000000'
Host	39	2	61	'000000001000000000000000000010000000000000000000000000000100000000000000'
Host	39	3	19	'000000000000000000000000000010000000000000000000000000000100000000000000'
Host	39	4	9	'000000001000000000000000001010000000000000000000000000000100000000000000'
Host	39	5	7	'000000000001000000000000000000000000000000000000101000000011000000000000'
Host	39	6	6	'000000000001000000000000000000000000000000000000100000000100000000000000'
Host	39	7	6	'000000001000000000000000000010000000001000000000000000000100000000000000'
Host	39	8	6	'000000009001000000000000000000000000000000000000100000000011000000000000'
Host	39	9	6	'000000001000000000000000000010000000000000000000000000000011000000000000'
Host	39	10	4	'000000000001000000000009000000000000000000000000100000000011000000000000'
Host	39	11	3	'000000001000000000000000000010000000000000000000010000000100000000000000'
Host	39	12	3	'000000001001000000000000000010000000000000000000000000000100000000000000'
Host	39	13	3	'000000000001000000000000000000000000000000000010100000000011000000000000'
Host	39	14	3	'000000000001000000000000000000000100000000000000100000000011000000000000'
Host	39	15	3	'000000001000000000000000000010000100000000000000001000000100000000000000'
Host	39	16	3	'000000001000001000000000000010000000000000000000000000000100000000000000'
Host	39	17	2	'000000000000000000000000000010000000000000000000001000000100000000000000'
Host	39	18	2	'000000001000000000000000000010000000000000000000001000000100000000000000'
Host	39	19	2	'000000001000000000009000000010000000000000000000000000000100000000000000'
Host	39	20	2	'000000001001000000000000000000000000000000000000100000000011000000000000'
Host	39	21	2	'000000000001000000000000001000000000000000000000100000000011000000000000'
Host	39	22	2	'000000009001000000000000000000000100000000000000100000000011000000000000'
Host	39	23	2	'000000001000000000000000000010000000000000000000100000000011000000000000'
Host	39	24	2	'020000000001000000000000000000000000000000000000100000000011000000000000'
Host	39	25	2	'000000000001090000000000000000000000000000000000100000000011000000000000'
Host	39	26	2	'000000001000000000000000000010090000000000000000000000000100000000000000'
Host	39	27	2	'000000000001000000000000000000000100000000000000101000000011000000000000'
Host	39	28	2	'000000001000000000000000000010000000000000000000000000001100000000000000'
Host	39	29	2	'000000000001000000000000000000000000000000000000100000001011000000000000'
Host	39	30	1	'000000000000000000000000000010000000000000000000010000000100000000000000'
Host	39	31	1	'000100001000000000000000000010000000000000000000010000000100000000000000'
Host	39	32	1	'000100001000000000000000000010000000000000000000000000000100000000000000'
Host	39	33	1	'000000000001000000000000000000000000000000000000101010000011000000000000'
Host	39	34	1	'000000001000000000000000000010000000001000000000001000000100000000000000'
Host	39	35	1	'000000001000000000000000000090000000000000000000000000000100000000000000'
Host	39	36	1	'000100000000000000000000000010000000000000000000000000000100000000000000'
Host	39	37	1	'000000000001000000000000000000000000001000000000000000000100000000000000'
Host	39	38	1	'000000000001000000000000000000000000000000000000100000000010000000000000'
Host	39	39	1	'000000000001000000000000000000000000000000000000100000000011010000000000'
Host	39	40	1	'000000001000000000000000000000000000000000000000100000000011000000000000'
Host	39	41	1	'000000000001000000000000000000000000000000000100100000000011000000000000'
Host	39	42	1	'000000000001000000000000000000000000000000000000000000000010000000000000'
Host	39	43	1	'000000000001000000000000000000000000000000000000100000010011000000000000'
Host	39	44	1	'000000000001000000000000000000000000000000000000100010000011000000000000'
Host	39	45	1	'000000000000000000000000000010000000000000000000000000000011000000000000'
Host	39	46	1	'000000000001000000000000000000000000000000000900100000000011000000000000'
Host	39	47	1	'000000000001000000000000000001000000000000000000100000000011000000000000'
Host	39	48	1	'000000000000000000000000000010000000000000000000100000000010000000000000'
Host	39	49	1	'000000001001000000000000000010000000000000000000000000000011000000000000'
Host	39	50	1	'000000000000000000000000000000000000000000000000100000000001000000000000'
Host	39	51	1	'020000000001000000000000000000000000000000000010100000000011000000000000'
Host	39	52	1	'000000001001000000000000000010000000000000000000110000000011000000000000'
Host	39	53	1	'000000001000000000000000000010000000000000000000900000000011000000000000'
Host	39	54	1	'000000001001000000000000000010000000000000000000900000000011000000000000'
Host	39	55	1	'000000001000000000001000000010000000000000000000000000000100000000000000'
Host	39	56	1	'000000000001000000000000000000000000000000000000000000000110000000000000'
Host	39	57	1	'000000001001000000000000000000000000000000000000100000000111100000000000'
Host	39	58	1	'000000001000000000000000000010000001000000000000000000000100000000000000'
Host	39	59	1	'000000001000000000010000000010000000000000000000100000000100000000000000'
Host	39	60	1	'000000100001000000000000000000000000000000000000100000000011000000000000'
Host	39	61	1	'000000000001001000000009000000000000000000000000100000001011000000000000'
Host	39	62	1	'000100000001000000000000000000000000000000000000000000000011000000000000'
Host	39	63	1	'000000001001000000000000000000000000000000000000101000000100000000000000'
Host	39	64	1	'000000001000000000000000000010000000000000000000001000001100000000000000'
Host	39	65	1	'000000001000000000000000009010000000000000000000000000000100000000000000'
Host	39	66	1	'000000001000000000000000000010000000000000000000001000000011000000000000'
Host	39	67	1	'000000000001000000000000000000000000000000000000000000000100000000000000'
Host	39	68	1	'000000000001000000000000000000000000000000000000111000000011000000000000'
Host	39	69	1	'000000009001000000000000000000000100000000000000100000000100000000000000'
Host	39	70	1	'000000000000000000000000000010000100000000000000000000000100000000000000'
Host	39	71	1	'000000000001000000000000000000000100000000000000100000000100000000000000'
Host	39	72	1	'000000000001000000000000000000000000000000000000900000000011000000000000'
Host	39	73	1	'000000001001000000000000000000000000000000000000100000001011000000000000'
Host	39	74	1	'000000000001001000000000000000000000000000000000100000000011000000001000'
Host	39	75	1	'000000000000000000000000000000000000000000000000100000001011000000000000'
Host	39	76	1	'000000000001000000000000000000000000000000000000101000000011100000000000'
Host	39	77	1	'000000000000000000000000000010000000000000000000010010000100000000000000'
Host	39	78	1	'000000001000000000000000000010000000010000000000000000000100000000000000'
Host	39	79	1	'000000001000000000000000001010000000000000000000000000001100000000000000'
Host	39	80	1	'000000001000000000000000000010000000000000000000000090000100000000000000'
Host	39	81	1	'000000000000000000000000000090000000000000000000901000001010010000000000'
Host	39	82	1	'000000000001000000000000000000000000000000000000101000001011000000000000'
Host	39	83	1	'000000009001000000000000000000000000000000000000100090000011000000000000'
Host	39	84	1	'000000000001000000000000000010000000000000000000000000001100000000000000'
Host	39	85	1	'000000001000000000000000000019000000000000000000000000001100000000000000'
Host	39	86	1	'000000001000000000000000000010000000000000000010000000000100000000000000'
Host	39	87	1	'000000001000000000000009000010000000000000000000011000000100000000000000'
Host	39	88	1	'020000000001000000000000000010000000000000000000000000000100000000000000'
Host	39	89	1	'020000001000000000000000000010000000000000000000011000000100000000000000'
Host	39	90	1	'020000001001000000000000000000000000000000000000100000000019010000000000'
Host	39	91	1	'000000001000001000000000000010000000001000000000001000001100000000000000'
Host	39	92	1	'000000000001001000000000000000000000000000000000101000000011000000000000'
Host	39	93	1	'020000000001001000000000000000000000000000000000101000000011000000000000'
Host	39	94	1	'000000001000000000000000000010000000001000000000000000000111000000000000'
Host	39	95	1	'000000000000001000000000000010000000000000000000000000000100000000000000'
Host	39	96	1	'000000000001000000000000001000000100000010000000000000001011000000000000'
Host	39	97	1	'000000000001000000000000000000000100001000000000100000000011000000000000'
Host	39	98	1	'000000000001000000000000000000000000000000000000100000009011000000000000'
Host	39	99	1	'000000001000000009000000009910000000000000000000000000000100090000000000'
Host	39	100	1	'000000009000001000000000000010000100000000000000001000000100000000000000'
Host	39	101	1	'000000000001000000000000000000000100000000000000100000000110000000000000'
Host	39	102	1	'000000001000000000001009000010000000000000000000000000000100000000000000'
Host	39	103	1	'000000009001000000009000000000000000000000000000100000000011000000000000'
Host	39	104	1	'000000001000000000000000001010000001000000000000000010000100000000000000'
Host	39	105	1	'000100001000001000000000000010000100000000000000000000001100000000000000'
Host	39	106	1	'000000001000000000000000000010000100000000000000000000000100000000000000'
Host	39	107	1	'000000001001000000000000000000000000000000000000100000000019000000000000'
Host	39	108	1	'020000000001010000000000000001000000000000000000100000000011000000000000'
Host	39	109	1	'020000000001000000000000000000000000000000000000001000001010000000000000'
Host	39	110	1	'020000000001000000000000000010000000000000000000000000001001000000000000'
Host	39	111	1	'000000000001000000000000000000000900000000000000101000001011000000000000'
Host	39	112	1	'000000000001001000000000000000000000000000000000100000001011000000000000'
Host	39	113	1	'020000000001000000000000000000000000000000000000101000000011000000000000'
Host	39	114	1	'000000000000000000009000000010000000000000000000100000000019000000000000'
Host	39	115	1	'000000000001000000000000000000000000000000000000000000000000000000000000'
Host	39	116	1	'000000000001001000000000000000000100000000000000100000000011000000000000'
Host	39	117	1	'000000000001000000000000000000000000000000000000100000000011100000000000'
Host	39	118	1	'000000009001000000000000000010000100000000000000000000000101000000000000'
Host	39	119	1	'000000000001000000000000000000000000000000000000101000001100000000000000'
Host	39	120	1	'000000001000000000000000000010000000000000000000100000000001000000000000'
Host	39	121	1	'000000000001000000000000000000000000000000000000110000000011000000000000'
Host	39	122	1	'000000000101000000000000000000000000000000000000100000000011000000000000'
Host	39	123	1	'000000001000000000000000000010000100000000000000000000000101000000000000'
Host	39	124	1	'020000000100000000000009000010000000000000000000000000000100000000000000'
Host	39	125	1	'000000001000000000000000000010000000000000000000000001000100000000000000'
Host	39	126	1	'000000000001000000000000000010000000000000000000100000000011000000000000'
Host	39	127	1	'000000000001000000000000000000000000000000000010111000000011000000000000'
Host	39	128	1	'000000000001000000000000000010000000000000000000011000000101000000000000'
Host	39	129	1	'020000000001001000000000000000000000000000000000100000000011000000000000'
Host	39	130	1	'000000000001000000000000000000000000000000000000100000001011090000000000'
Host	39	131	1	'000000001000000000000000000010000000000000000000910000000100000000000000'
Host	39	132	1	'000000001000000000000000000000000100000000000000100000000010000000000000'
Host	39	133	1	'000000001000000000000000001010000000000000000000001000000100000000000000'
Host	39	134	1	'000000000001000000000000000010000000000000000000000000000111000000000000'
Host	39	135	1	'020000001000000000000000001010000001000000000000000010000100000000000000'
Host	39	136	1	'000000000001000000000000000000000000000000000000100090000011000000000000'
Host	39	137	1	'000000000001000000000000000000000090000000000000100000000011000000000000'
Host	39	138	1	'000000000001000000000000000000000100000000000000101000001011000000000000'
Host	39	139	1	'000000001000001000000000000010000000000000000000000001000100000000000000'
Host	39	140	1	'000000000001000000000000009000000000000000000000000000000100000000000000'
Host	39	141	1	'000000000001000900000000000000000000000000000000011000000001000000000000'
Host	43	1	65	'000000000001000000000000000000000000000000000000100000000011000000000000'
Host	43	2	31	'000000001001000000000000000000000000000000000000100000000011000000000000'
Host	43	3	16	'000000000001000000000000001000000000000000000000100000000011000000000000'
Host	43	4	15	'000000009001000000000000000000000000000000000000100000000011000000000000'
Host	43	5	8	'000000000001000000000000001000000000000000000000100000000011010000000000'
Host	43	6	8	'000000001001000000001000000010000000000000000000000000000100000000000000'
Host	43	7	7	'000000000001000000000000000000000100000000000000100000000011000000000000'
Host	43	8	7	'000000001001000000001001000010011000000010000000000001000100000000000000'
Host	43	9	5	'000000001001000000000000001000000000000000000000100000000011000000000000'
Host	43	10	5	'000000000001000000000000000000000100000000000000100000001011000000000000'
Host	43	11	5	'000000001001000000000000000000000000000000000000101000000011000000000000'
Host	43	12	4	'000000000001000000000000000000000000000000000000100000000011010000000000'
Host	43	13	4	'000000000001000000000000001000000100000000000000100000001011000000000000'
Host	43	14	4	'000000000001000000000000000000000000000000000000100000001011000000000000'
Host	43	15	3	'000000001001000000000000001000000000000000000000100000000011010000000000'
Host	43	16	3	'000000000001000000000000000000000000000000000010100000000011000000000000'
Host	43	17	3	'000000009001000000000000000000000100000000000000100000000011000000000000'
Host	43	18	3	'000000001001000000000010001090000000000000000000000000000100000000000000'
Host	43	19	3	'000000001001000000000000000010000000000000000000000000000100000000000000'
Host	43	20	3	'000000000001000000000000000000000000000000000000101000000011000000000000'
Host	43	21	2	'000000001001000000000000000001000000000000000000100000000011000000000000'
Host	43	22	2	'000000009001000000000000001000000000000000000000100000000011000000000000'
Host	43	23	2	'000000001001000000000000000000000000000000000000100000000110000000000000'
Host	43	24	2	'000000000001000000000000000000000000000000000000100000000100000000000000'
Host	43	25	2	'000000000001000000000000000000009000000000000000100000000011000000000000'
Host	43	26	2	'000000001001000000000000001000000000000000000000000000000011000000000000'
Host	43	27	2	'000000000001000000001000000000000000000000000000100000000011000000000000'
Host	43	28	2	'000000001001000000000010001090000000000000000000000000000101000000000000'
Host	43	29	2	'000000000001000000000000000090000000000000000000100000000011000000000000'
Host	43	30	2	'000000000001000000000000000000000000010000000000100000000011010000000000'
Host	43	31	2	'000000000001000000000000000000000100000000000000101000000011000000000000'
Host	43	32	2	'000000000001000000000000001000000100000000000000101000001011000000000000'
Host	43	33	1	'000000000001000000000000001000000000000000000000000000000001000000000000'
Host	43	34	1	'000000001000000000000000000010000000000000000000000000000001000000000000'
Host	43	35	1	'000000001001000000000000000010000000000000000000100000000101000000000000'
Host	43	36	1	'000000001001000000000000001010000000000000000000000000000100000000000000'
Host	43	37	1	'000000001001000000000000000010000000000000000000000000000101000000000000'
Host	43	38	1	'000000001001000000000000000000000000000000000000100000000111000000000000'
Host	43	39	1	'000000001001000000000000001000000000000000000000100000000111010000000000'
Host	43	40	1	'000000000001000000000000001000000000000000000010100000000011000000000000'
Host	43	41	1	'000000001001000000000000000010000000000000000000100000000011010000000000'
Host	43	42	1	'000000001001000000000000000000000000000000000000100000000011010000000000'
Host	43	43	1	'000000000001000000000000000000000000000020000100100000000011000000000000'
Host	43	44	1	'000000001001010000000000001010000000000000000000100000000011000000000000'
Host	43	45	1	'000090000001000000000000000000000000000000000000100000000011010000000000'
Host	43	46	1	'000000000001000000001000001001000000000000000000000000000011000000000000'
Host	43	47	1	'000000001001000000000000001011001000000000000000100000000011000000000000'
Host	43	48	1	'000000001001000000001000000010001000000000000000000000000100000000000000'
Host	43	49	1	'000000001001000000001000000010000000000010000000000001000011000000000000'
Host	43	50	1	'000000001001000000001000000010000000000000000000100000000100000000000000'
Host	43	51	1	'001000000001000000000000000000000000000000000000000000000001000000000000'
Host	43	52	1	'000001000001000000000000001000000000000000000000100000000100010000000000'
Host	43	53	1	'000000000001000000000000001010000000000000000000100000000110000000000000'
Host	43	54	1	'000000001000000000000000001010000000000000000000100000000011000000000000'
Host	43	55	1	'000000000001000009000000000000000000000000000000100000000011000000000000'
Host	43	56	1	'000000000001000000000000000000000000000000000000110000000011000000000000'
Host	43	57	1	'000000001001000000000000000000000000000000000000100000001011000000000000'
Host	43	58	1	'000000000001000000000000001000000000000000000000110000001011000000000000'
Host	43	59	1	'000000000001000000000009000000000000000000000000100000000011000000000000'
Host	43	60	1	'000000000001000000000000001009000000000000000000100000000011010000000000'
Host	43	61	1	'000000001001000000000000001000000000000000000100100000000011000000000000'
Host	43	62	1	'000000000001000000000000000000000000000000000100100000000011010000000000'
Host	43	63	1	'000000001001000000000010001000000000000000000000100000000011000000000000'
Host	43	64	1	'000000000001000000000000000000000000000010000100100000000011000000000000'
Host	43	65	1	'000000000001000000000000000000000000000000000000100010000011000000000000'
Host	43	66	1	'000000000001000000000000000000000000000000010000100000000011000000000000'
Host	43	67	1	'000000001001000000001000000010000000000000000000100000000011000000000000'
Host	43	68	1	'000000001001000000000000000010000000000000000000000000000000000000000000'
Host	43	69	1	'000000001001000000000000000000000000000000000000100000000011000010000000'
Host	43	70	1	'000000000001000000000000000000000000000000000000100000000000000000000000'
Host	43	71	1	'000000000001000000000000000010000000000010000100000000000100000000000000'
Host	43	72	1	'000000000001000000000000000000000000000010000010100000000011000000000000'
Host	43	73	1	'000000001001000000001000000010000000000010000000000001000100000000000000'
Host	43	74	1	'000000000001000000000000000000011000000000000000100000000001000000000000'
Host	43	75	1	'000000001001000000001001000010011000000000000000100000000011000000000000'
Host	43	76	1	'000000000001000000000000001000000000000000000000000009000110000000000000'
Host	43	77	1	'000000001001000000001000000010001000000000000000000009000100000000000000'
Host	43	78	1	'000000001001000000001000000010001000000090000000000009000100000000000000'
Host	43	79	1	'000000000001000000000000000000000000000000000000101009000110000000000000'
Host	43	80	1	'000000001001000000000001000000001000100090000000100001000011000000000000'
Host	43	81	1	'000000001001000000001009000000000000000000000000100000000011000000000000'
Host	43	82	1	'000000001001000000000009000090001000000000000000000000000011000000000000'
Host	43	83	1	'000000001001000000000000001010000000000000000000000000000011000000000000'
Host	43	84	1	'000000000001000000000000000000011000000000000000000000000010000000000000'
Host	43	85	1	'000000001001000000001000001010011000000000000000000000000019000000000000'
Host	43	86	1	'000000010001000000000000001000010000000000000000100000000019010000000000'
Host	43	87	1	'000000001001000000000000000000000000000000000000000000000019000000000000'
Host	43	88	1	'000000001001000000000010001090000000000000000000100000000019000000000000'
Host	43	89	1	'000000001001000000000000001010000100000000000000000000000100000000000000'
Host	43	90	1	'000000009001000000000000000010001000000000000010100000000110000000000000'
Host	43	91	1	'000000000001000000000000001010000100000000000000000000000100000000000000'
Host	43	92	1	'000000000101000000000000000000000000000000000000100000000011000000000000'
Host	43	93	1	'000000001001000000001000000010000000000010000100000000000100000000000000'
Host	43	94	1	'000000001001000000001001000010001000000000000000000001000100000000000000'
Host	43	95	1	'000000000001000000000000000010001000000000000000000001000000000000000000'
Host	43	96	1	'000000000001000000000000001010000000001000000000100000000100000000000000'
Host	43	97	1	'000000000001000000000000000000000000000000000000000000000011000000000000'
Host	43	98	1	'000000001001000000009000000000000000000000000000100000000011000000000000'
Host	43	99	1	'000000009001000000000000000000000100000000000010100000000011000000000000'
Host	43	100	1	'000000000001000000000000000000000100000000000010100000000011000000000000'
Host	43	101	1	'000000000001000000000000000000000100000020000000100000000011000000000000'
Host	43	102	1	'000000000001000000000000001000000100000010000000100000000011000000000000'
Host	43	103	1	'000000090001000000000000001000000000000000000000100000000011010000000000'
Host	43	104	1	'000000000001000000000000000000000000000000000000100100000011010000000000'
Host	43	105	1	'000000000001000000000001001000000000000000000000100000000011000000000000'
Host	43	106	1	'000000000001000000000000000000000000000000000000100000000111000000000000'
Host	43	107	1	'001000000101000000000000000000000000000000000000100000000011000000000000'
Host	43	108	1	'000000001001000000000010001090000000000000000000001000000100000000000000'
Host	43	109	1	'000000009001000000000010000090000000000000000000100000000110000000000000'
Host	43	110	1	'000000000001000000000010001090000000000000000000000000000110010000000000'
Host	43	111	1	'000000000001000000000000010000000000000000000000100000000011010000010000'
Host	43	112	1	'000000001001000009000000001010000000000000000000000000000100000000000000'
Host	43	113	1	'000000001001000000000001001090001000000000000000100001000011010000000000'
Host	43	114	1	'000000000001000000000000000010000000000000000000100000000011010000000000'
Host	43	115	1	'000000000001000000000000000000000000000000000000100000000010000000000000'
Host	43	116	1	'000000000001000000200000000000000000000000000000100000000011000000000000'
Host	43	117	1	'000000000000000000000000000010000000000000000000000000000001000000000000'
Host	43	118	1	'020000009001000000000000000000000000000000000000100000000011000000000000'
Host	43	119	1	'020000001001000000000000000000000000000000000000100000000011000000000000'
Host	43	120	1	'000000000001000000001000000010000000000000000000000000000011000000000000'
Host	43	121	1	'000000000001000000001000000010000000000010000000000000000100000000000000'
Host	43	122	1	'000000001001000000001000000010000000000000000001000000000100000000000000'
Host	43	123	1	'000000001001000000001000000090001000000000000000000000000011000000000000'
Host	43	124	1	'000000000001000000000000000090001000000000000000000000000101000000000000'
Host	43	125	1	'000000001001000000001000000000001000000000000000000000000011000000000000'
Host	43	126	1	'000000001001000000001001000010011000000010000000000000000011000000000000'
Host	43	127	1	'000000001001000000009000000010011000000090000000000001000100000000000000'
Host	43	128	1	'000000001001000000001000001000011000000000000000100000000110000000000000'
Host	43	129	1	'000000001001000000001000000010011000000010000001000001000110000000000000'
Host	43	130	1	'000000001001000000001001000010011000000000000000000000000000000000000000'
Host	43	131	1	'000000001001000000001001000010011000001010000000000001000100000000000000'
Host	43	132	1	'000100001001000000001001000010011000000010000100000001000100000000000000'
Host	43	133	1	'000000001001000000001001000010011000000010000000000000000100000000000000'
Host	43	134	1	'000000000001000000000001000090011000000000000000109001000100000000000000'
Host	43	135	1	'000000001001000000000001001000011000000010000000000001000001000000000000'
Host	43	136	1	'000000001001000000001001000010011000000010000000000001001100000000000000'
Host	43	137	1	'000000001001000000001001000010011000000010000000100000000001000000000000'
Host	43	138	1	'000000001001000000001001001010011000000010000000000001000010000000000000'
Host	43	139	1	'000000000001000000001000000010011000000010000000000001000100000000000000'
Host	43	140	1	'000000001001000000001001000010010000000000000000000000000100000000000000'
Host	43	141	1	'000000009001000000000000000000010000000010000000000001000110000000000000'
Host	43	142	1	'000000000001000000000001000000010000000000000000100000000011010000000000'
Host	43	143	1	'000000001101000000000000000000000000000000000000100000000000000000000000'
Host	43	144	1	'000000000001000000000000001000010000000000000000100000000011000000000000'
Host	43	145	1	'000000009001000000000000001000090000000000000000100000000011000000000000'
Host	43	146	1	'000000009001000000000090001000000000000000000000101000000011010000000000'
Host	43	147	1	'000000000001000000000000000010001000000000000000000001000011000000000000'
Host	43	148	1	'000000001001000000000000000010000000000000000000010000000100000000000000'
Host	43	149	1	'000000001000000000000000090010000000001000000000000000000100000000000000'
Host	43	150	1	'000000001001000000001000001000000100000000000000100000000010000000000000'
Host	43	151	1	'000000001001010000001000000000000100000000000000100000001011000000000000'
Host	43	152	1	'000000000001000000001000000000000100000000000000100000001011000000000000'
Host	43	153	1	'000000001001000000000000000000000000000000000010100000001011000000000000'
Host	43	154	1	'000000001001000000000000000000000100000000000000100000001010000000000000'
Host	43	155	1	'000000000001000000009000001000000100000000000000101000000011010000000000'
Host	43	156	1	'000000001001000000000000000000000100000010000000100000000011000000000000'
Host	43	157	1	'000000000001000000000000000000000100000100000000101000000011110000000000'
Host	43	158	1	'000000001001000000000000000000000100000000000100000000000000000000000000'
Host	43	159	1	'000000001001000000000000000010000100000000000000000000000100000000000000'
Host	43	160	1	'000000000001000000000000000010000000000000100000100000000011000000009000'
Host	43	161	1	'000000001001000000000000000000000000000000000000100010000011000000000000'
Host	43	162	1	'000000001001000000000001000000000100000000000000000000000011000000000000'
Host	43	163	1	'000000009001000000000000001000000100000000000000100000000011010000000000'
Host	43	164	1	'000000001001000000000000000010000000000000000000000000000011000000000000'
Host	43	165	1	'000000000000000000000000001000000000000000000000000000000100000000000000'
Host	43	166	1	'000000001001000000001000000010000000000000000000100000000910000000000000'
Host	43	167	1	'000000001001000000000000000010000000000000000000001000000100000000000000'
Host	43	168	1	'000000001001000000000000001090000000000000000000101000000011000000000000'
Host	43	169	1	'000000000001000000000000001000000000000000000000100000000011100000000000'
Host	43	170	1	'000000000001000000000000001010000000000000900000000000000100000000000000'
Host	43	171	1	'000000000001000000000000000000000000000000000000900000001101000000000000'
Host	43	172	1	'000000000001000000000000000000000000000000000000101000001011090000000000'
Host	43	173	1	'020000000001000000000000000000000000000020000000100000000011000000000000'
Host	43	174	1	'000000000001000000000000000000000000000000000000111010000011000000000000'
Host	43	175	1	'000000000001000000000000001000000000000000000000111000000011010000000000'
Host	43	176	1	'000000009001000000000000001000000000000000000000110000000011010000000000'
Host	43	177	1	'000000001001000000000000001010000000000000000000000000000000000000000000'
Host	43	178	1	'000000009001000000000000000000000000000000000000100001000100000000000000'
Host	43	179	1	'000000000001000000000000000000000000000000000000100001000100000000000000'
Host	43	180	1	'000000001000000000000009000010000000009000000000000000001101000000000000'
Host	43	181	1	'000000001001000000000090000010000000000000000000110000000011000000000000'
Host	43	182	1	'000000001001000000001009000010010000000000000000000000001011000000000000'
Host	43	183	1	'000000001001000000001909001010011100000000000000000000000010000000000000'
Host	43	184	1	'000000001001000000009009001010011000000000000000000000000100000000000000'
Host	43	185	1	'000000000001000000001000001010019000000000000000000000000000000000000000'
Host	43	186	1	'000000000001000000001009000000011000000010000000000000000011000000000000'
Host	43	187	1	'000000001001000000000000000010011000000090000000000000000019000000000000'
Host	43	188	1	'000000001001000000001001000000011100000000000000000000000011000000000000'
Host	43	189	1	'000000001001000000001009000090011000000000000000900000000100000000000000'
Host	43	190	1	'000000001001000000001001000000011000000000000000001000000000000000000000'
Host	43	191	1	'000000000001000000001009000000010000000000000000101000000011000000000000'
Host	43	192	1	'000000000001000000000000001010000000000010000000000000001100000000000000'
Host	43	193	1	'000000001001000000001001000010011100000010000000000001000100000000000000'
Host	43	194	1	'000000001001000000001000000010000100000000000000000000000100000000000000'
Host	43	195	1	'000000001001000000000000000000000100000000000100101000000000000000000000'
Host	43	196	1	'000000001001000000000000001090000000000000000000000000000011010000000000'
Host	43	197	1	'000000000001000000000000000010000100000000000000000000001000000000000000'
Host	43	198	1	'000000000001000000000009000000000000000000000000100000001011010000000000'
Host	43	199	1	'000000001001000000000000001010000100000000000000000000001100000000000000'
Host	43	200	1	'000000000001000000000000000000010009000000000000101000001011000000000000'
Host	43	201	1	'000000001001000000001001000010011000000010000000100001001001010000000000'
Host	43	202	1	'000000001001000000000000001010000000000000000000000000000101000000000000'
Host	43	203	1	'000000009001000000000000000000000000000000000000100000001011000000000000'
Host	43	204	1	'000000009001000000000000001000000000000000000000100000001011000000000000'
Host	43	205	1	'000000000001000000000000000000010000000000000000100000000011000000000000'
Host	43	206	1	'000000000001000000000000001000000000000000000000101000000011000000000000'
Host	43	207	1	'000000010001001000000000000090000000000000000000101000001010000000000000'
Host	43	208	1	'000000009001000000000000000090000000001000000000001000000001000000000000'
Host	43	209	1	'000000001001000000000000000010000000000000000000000001001000090000000000'
Host	43	210	1	'000000001001000000001001000910011000000010000000001001000100000000000000'
Host	43	211	1	'000000001001000000001009000010011000000000000000001009000100000000000000'
Host	43	212	1	'000000001001000000001000000090000000000000000000000000000000000000000000'
Host	43	213	1	'000000000001000000000000001000000000000000000000101000000011010000000000'
Host	43	214	1	'000000000001000000000000000010000000000000000000100001000000000000000000'
Host	43	215	1	'000000000001000000000000001000000000000000000000001010001001000000000000'
Host	43	216	1	'020000000001000000009000000010000000000000000000900000000109000000000000'
Host	43	217	1	'020000000001000000000000000010000000000000000000100000000100000000000000'
Host	43	218	1	'000000000001000000000000000000000000000000000000100000000001000000000000'
Host	43	219	1	'020000000001000000000000000000000000000010000000000001000101000000000000'
Host	43	220	1	'020000001001000000001000000000010000000000000000100001000000000000000000'
Host	43	221	1	'000000001001000000001000000010010000000000000000000000001100000000000000'
Host	43	222	1	'000000000001001000000000000000000000000000000000100000000011000000000000'
Host	43	223	1	'000000009001001000000000001000000000000000000000100000000011000000000000'
Host	43	224	1	'000000009001000000000000000000000000000000000000000000000001000000000000'
Host	43	225	1	'000000009001000000001009001010000100000000000000100000000011000000000000'
Host	43	226	1	'000000000001000000000000000010000100000000000000000000000110000000000000'
Host	43	227	1	'000000009001000000000000000000000000000000000000000000000009000000000000'
Host	43	228	1	'000000001001000000001000009010000000109000000000000000000011010000000000'
Host	43	229	1	'000000000101000000000009009000000000010000000000101000000010000000000000'
Host	43	230	1	'000000001000000000000000001010000000000000000000001000000000000000000000'
Host	43	231	1	'000000001001000000001001000010001100000000000000001000009100000000000000'
Host	43	232	1	'000000001001000000000010001010000100000000000000001000009100000000000000'
Host	43	233	1	'000000001001000000000000000000000000000000000000111000000011000000000000'
Host	43	234	1	'000000001001000000000000001000000000000000000000101000000011000000000000'
Host	43	235	1	'000000000001000000000000001000000000000000000000100000001011010000000000'
Host	43	236	1	'000000001001000000000000000000000100000000000000100000000110000000000000'
Host	43	237	1	'020000000001000000000000000000000100000000000000100000000011000000000000'
Host	43	238	1	'020000000001001000000000000000000000000000000000100000000011000000000000'
Host	43	239	1	'000000000001001000000000000010000100000000000000000000001001000000000000'
Host	43	240	1	'000000001001000000000000000001000000000000000000100000001011000000000000'
Host	43	241	1	'000000000001000000001000000010000000000000000000100000001101000000000000'
Host	43	242	1	'000000001001000000000009001010000000000010000000100000001011000000000000'
Host	43	243	1	'000000000001000000000009000000000000000000000000100000001011000000000000'
Host	43	244	1	'000000000001000000000009000010000000000000000000010000000100000000000000'
Host	43	245	1	'000000000001000000000009000010000000000000000000900000000110000000000000'
Host	43	246	1	'000009000001000000000000001000000000000000000000100000000100000000000000'
Host	43	247	1	'000000001001000000000009001010010000000010000000000001001100000000000000'
Host	43	248	1	'000000001001000000000009000010000000000010000000010001000100000000000000'
Host	43	249	1	'000000001001000000001001000010010000000010000000100001000111000000000000'
Host	43	250	1	'000000001001000000000000001010000000000000000000001000000111000000000000'
Host	43	251	1	'000000000001000000000000001000000000000000000000100000001011000000000000'
Host	43	252	1	'000000000001000000000000001000001100000010000000001000000011000000000000'
Host	43	253	1	'000000000001000000000000001000000100000000000000101000000011000000000000'
Host	43	254	1	'000000001000090000000000001010000000000000000000100000000109000000000000'
Host	43	255	1	'000000001001000000000000000000000000000000000000100001000011000000000000'
Host	43	256	1	'000000001001000000001001000000001000000000000000000000000100000000000000'
Host	43	257	1	'000000000001000000000000001000000000000000100000100000000011000000000000'
Host	43	258	1	'000000001001000000001000000010010100000000000000000000000100000000000000'
Host	43	259	1	'000000001001010000000000001010000100000000000000011000000100000000000000'
Host	43	260	1	'000000001001000000001001000010011000000010000000900001001100000000000000'
Host	43	261	1	'000000001001000000009000000010010000009000000000100000000001000000000000'
Host	43	262	1	'000000001001000000000009000000000000000000000000100000000900000000000000'
Host	43	263	1	'000000001001000000000009000000000000000000000000101000000011000000000000'
Host	43	264	1	'000000000101001000000000000000000100000000000000100000000011010000000000'
Host	43	265	1	'000000000001000000000009000001000000000000000000900000000011000000000000'
Host	43	266	1	'000000001001000000000000001000000000000000000000101000001010010000000000'
Host	43	267	1	'000000000001000000000000000000000000000000000900190000000011000000000000'
Host	43	268	1	'000000000001000000000000000000000000000000000000900000000100000000000000'
Host	43	269	1	'000000001001001000000000000000000000000000000000100000000011000000000000'
Host	43	270	1	'000000000001000000000009001000000000000000000000100000000000000000000000'
Host	43	271	1	'000000000001000000000000000090000000000020000010100000000011000000000000'
Host	43	272	1	'000900009001000000000000000000000000000000000000001000001100000000000000'
Host	43	273	1	'020000000001000000000000000900000000000000000000100000000011000000000000'
Host	43	274	1	'000000001001000000000000009910000000000000000000009000000100000000000000'
Host	43	275	1	'000000001001000000001009001010010000000010000000000001001100000000000000'
Host	43	276	1	'020000001000000000000000000000000000000000000900001000001109000000000000'
Host	43	277	1	'000000001001000000000000000010001000000000000000001000000009000000000000'
Host	43	278	1	'000000001001000000000000000010000100000000000000000000000100010000000000'
Host	43	279	1	'001000009001000000000000000000000100000000000000101000000011000000000000'
Host	43	280	1	'000001000001000000000000000000000000000000000000100000001011000000000000'
Host	43	281	1	'000000000001000000000000000010000000000000000000100000000011000000000000'
Host	43	282	1	'000000000001000000000009001000000000000010000000000000000011010000000000'
Host	43	283	1	'000000000001000000000000000000000000000020000000100000000011000000000000'
Host	43	284	1	'000000001001000000000000000000000100000000000000100000000011000000000000'
Host	43	285	1	'000000001001000000001001000010010100000000000000000000000011000000000000'
Host	43	286	1	'000000001001000000001001000010011000000010000000001001000100000000000000'
Host	43	287	1	'000000001001000000001001000010011000000010001000000000001011010000000000'
Host	43	288	1	'900000001001000000009000000010000000000000000000010000000100000000000000'
Host	43	289	1	'000000000001000900000000000000000100000000000000101000001011010000000000'
Host	43	290	1	'000000001001000000000000000010000100000000000000000000000011000000000000'
Host	50	1	138	'000000001000000000000000011010000000000000000000000000000100001000000000'
Host	50	2	86	'000000001000000000000000001010000000000000000000000000000100000000000000'
Host	50	3	69	'000000001001000000001001000010011000000010000000000001000100000000000000'
Host	50	4	54	'000000001000000000000000000010000000000000000000000000000100000000000000'
Host	50	5	23	'000000001000000000000000001010000000001000000000000000000100000000000000'
Host	50	6	22	'000000001101000000000010001010000011000010000000000010000100000000000000'
Host	50	7	20	'000000001000000000000000000010000000001000000000000000000100000000000000'
Host	50	8	17	'000000001101000000000010001010000001000010000000000010000100000000000000'
Host	50	9	16	'000000001000000000000000011010000000000000000000001000000100001000000000'
Host	50	10	12	'000000001001000000001000000010000000000010000100000000000100000000000000'
Host	50	11	12	'000000001000010000000000000010000000010000000000000000000100000000000000'
Host	50	12	11	'000000001000000000000000011010000000000000000000000000000100000000000000'
Host	50	13	10	'000000001000000000000000001010000000000000000000000000001100000000000000'
Host	50	14	10	'000000001001000000000000001000000000000000000000100000000011000000000000'
Host	50	15	9	'000000001000000000000000001010000000000000000000000000000100001000000000'
Host	50	16	8	'000100001000000000000000001010000000000000000000000000000100000000000000'
Host	50	17	8	'000000001101000000000000001010000000010000000000000000000100000000000000'
Host	50	18	8	'000000001001000000000000000000000000000000000000100000000011000000000000'
Host	50	19	8	'000000001001000000001001000010011100000010000000000001000100000000000000'
Host	50	20	7	'000000001001000000000000001010000000000000000000000000000100000000000000'
Host	50	21	7	'000000001000000000000000011010000000010000000000000000000100001000000000'
Host	50	22	7	'000000001000000000000000011010000100000000000000000000000100001000000000'
Host	50	23	6	'000000001100000000000000001010000000000000000000000000000100000000000000'
Host	50	24	5	'000000001000000000000000011010000000001000000000000000000100001000000000'
Host	50	25	5	'020000001000000000000000011010000000000000000000000000000100001000000000'
Host	50	26	5	'000000001000000000000000011010000000000000000000000000001100001000000000'
Host	50	27	4	'000000001000000000000000000010000000000000000000000000001100000000000000'
Host	50	28	4	'000000001000000000000000000010000000001000000000001000000100000000000000'
Host	50	29	4	'000000001000000000000000001010000000001000000000001000000100000000000000'
Host	50	30	4	'000000001000000000000000001010000100000000000000000000000100000000000000'
Host	50	31	4	'000000001101000000000010001010000011000010000000001010000100000000000000'
Host	50	32	4	'000000001001000000001000000010000000000000000000000000000100000000000000'
Host	50	33	4	'000000001000000000000000000010000100000000000000000000000100000000000000'
Host	50	34	4	'000000001000000000000000001010000100000000000000000000001100000000000000'
Host	50	35	4	'000000001000000000000000000010000000000000000000001000000100000000000000'
Host	50	36	4	'000000001000000000000000011010000100000000000000000000000100000000000000'
Host	50	37	4	'000000001000000000000000001010000000000000000000001000000100000000000000'
Host	50	38	4	'000000000001000000000000000000000000000020000000100000000011000000000000'
Host	50	39	4	'000000000001000000000000001000000000000000000000100000000011010000000000'
Host	50	40	4	'000000001001000000001001001010011000000010000000000001000100000000000000'
Host	50	41	3	'000000001000000000000000001010000000001000000000000000000100100000000000'
Host	50	42	3	'000000001000000000000000011010000000000000000000000001000100001000000000'
Host	50	43	3	'000000001000000000000000011011000000090000000000000000000100001000000000'
Host	50	44	3	'000100001000000000000000000010000000000000000000000000000100000000000000'
Host	50	45	3	'000000001000000000000000001010000000000000000000001000001100000000000000'
Host	50	46	3	'000000001000000000000000011010000100000000000000001000000100001000000000'
Host	50	47	3	'000000001000000000000000011010000000000000000000001000001100001000000000'
Host	50	48	3	'000000001101000000000010001010000011000010000000001010001100000000000000'
Host	50	49	3	'000000000001000000000000000000000000000000000000100000000011000000000000'
Host	50	50	3	'000000001001000000001001000010011000000010000100000001000100000000000000'
Host	50	51	3	'020000001001000000001001000010011000000010000000000001000100000000000000'
Host	50	52	2	'000000011000000000000000000010000000000000000000000000000100000000000000'
Host	50	53	2	'000000001100000000000000011010000000000000000000000000000100001000000000'
Host	50	54	2	'000000001000000000000000001010000000001000000000000000000100001000000000'
Host	50	55	2	'000000001000000000000000011010000000000000000000000000000100101000000000'
Host	50	56	2	'000000001000000000000000011010000000000000000000000000000100009000000000'
Host	50	57	2	'000000001000000000000000011010000000000000000000010000000100001000000000'
Host	50	58	2	'000000001000000000000000001010000100001000000000000000000100000000000000'
Host	50	59	2	'000000001101000000000010001010000111000010000000000010000100000000000000'
Host	50	60	2	'000000001000010000000000001010000000000000000000000000000100000000000000'
Host	50	61	2	'000000001000000009000000001010000000000000000000000000000100000000000000'
Host	50	62	2	'000000001101000000000000001010000100010000000000000000000100000000000000'
Host	50	63	2	'000000001001000000000010001010000000000000000000000000000100000000000000'
Host	50	64	2	'000000001000000000000000001010000000001000000000000000000190000000000000'
Host	50	65	2	'000000001001000000001001000010011000000000000000000000000100000000000000'
Host	50	66	2	'000000001000000000000000000010000000000000000000000000000100001000000000'
Host	50	67	2	'000000001000000000000000000010000000090000000000000000000100000000000000'
Host	50	68	2	'000000001000000000000000000010000000000000000000000000009100000000000000'
Host	50	69	2	'000000001000000000000000001010000000000000000000000009000100000000000000'
Host	50	70	2	'000000001000000000000000001010000000000000000000010000001100000000000000'
Host	50	71	2	'000000001000000000000000011010000100000000000000000000001100001000000000'
Host	50	72	2	'020000001000000000000000011010000000001000000000000000000100001000000000'
Host	50	73	2	'020000001000000000000000000010000000000000000000000000000100000000000000'
Host	50	74	2	'000000001000010000000000000010000000010000000000010000000100000000000000'
Host	50	75	2	'000000001000000000000000001010000000000000000000010000000100000000000000'
Host	50	76	2	'020000001000000000000000001010000000000000000000000000000100000000000000'
Host	50	77	2	'000000000001000000000000000000000000100000000000100000000011000000000000'
Host	50	78	2	'000000001001000000000000001000000000000000000000101000000011000000000000'
Host	50	79	2	'000000009001000000000000000000000000000000000000100000000011000000000000'
Host	50	80	2	'000100001000000000000000001010000000000000000000000000000100009000000000'
Host	50	81	2	'000000001000000000000000001010000000101000000000000000009100000000000000'
Host	50	82	2	'000000001001000000001001000010011000001010000000000001000100000010000000'
Host	50	83	2	'000000001001000000001001000010011000000010000000010001000100000000000000'
Host	50	84	2	'000000001001000000001001000010011000000010000000000001001100000000000000'
Host	50	85	2	'000000001000000000000000011010000000000000000000011000000100001000000000'
Host	50	86	2	'000000000001000000000000001000000000000000000000101000001011000000000000'
Host	50	87	1	'000000001000000000000000000010000000000000000100000000000100000000000000'
Host	50	88	1	'000000011000000000000000001010000000000000000000000000000100000000000000'
Host	50	89	1	'000000001000000000000000000010000000001000000000000000000100100000000000'
Host	50	90	1	'000000001101000000000010001010000001000010000000000000000100000000000000'
Host	50	91	1	'000000001000000000000000001010000001000010000000000010000100000000000000'
Host	50	92	1	'000000001101000000000010001010000011000010000000000011000100000000000000'
Host	50	93	1	'000000001001000000000010001010000010000000000000000000000100000000000000'
Host	50	94	1	'000000001101000000000010001010000011000010000000000010000100001000000000'
Host	50	95	1	'000000001001000000000000001010000000000000000000000000000100000000000900'
Host	50	96	1	'000000011000000000000000001010000000100000000000000000000100001000000000'
Host	50	97	1	'010000001000000000000000011010000000000000000000000000000100001000000000'
Host	50	98	1	'000000000000000000000000011010000000000000000000000000000100001000000000'
Host	50	99	1	'000000001000000000000000001010000000000000000000000000000100101000000000'
Host	50	100	1	'000000001000000000000000011010000000000000000000000000000100001000010000'
Host	50	101	1	'000000001000000000000000011010000000000000000000000000000100001900000000'
Host	50	102	1	'000000001000000000000000011010000000010000000000000000000100009000000000'
Host	50	103	1	'000000001000000000000000000010000000001000000000000000001100000000000000'
Host	50	104	1	'000000001000000000000000011010000000000000000000000000009100001000000000'
Host	50	105	1	'000000001000000000000000001010000000001000000000000000001100000000000000'
Host	50	106	1	'000000001900000000000000011010000000001000000000000000000100000000000000'
Host	50	107	1	'000000001901000009000010001010000000001000000000000000000100000000000000'
Host	50	108	1	'000100001000000000000000001010000000000000000000001000000100000000000000'
Host	50	109	1	'000000001000000000000000001010000000000000000000001000000100010000000000'
Host	50	110	1	'000000001090000000000000000010000100000000000000000000000100000000000000'
Host	50	111	1	'000000001000000000000000001010000100001000000000001000000100000000000000'
Host	50	112	1	'000000001001000000001000000010000100001010000000000000000100000000000000'
Host	50	113	1	'000100001101010000000010001010000011000010000000000010000100000000000000'
Host	50	114	1	'000000001101000000001010001010000000000000000000000000000100000000000000'
Host	50	115	1	'000000001101000000001000000011000000000010000100000000000100000000000000'
Host	50	116	1	'000000001001000000001000000010000000000010000100000001000100000000000000'
Host	50	117	1	'000000001001000000000000000010000000000020000000000000000100000000000000'
Host	50	118	1	'000000001001000000001000000010000000000010000000000000000100001000000000'
Host	50	119	1	'000000091000000000000000000010000000001000000000000000000100000000000000'
Host	50	120	1	'000000001000000000000000001010000900001000000000000000000100000000000000'
Host	50	121	1	'000000001000000000000000001010000000000000000000000000000100000000090000'
Host	50	122	1	'000000001000000000000000001010000000000000000000000000000100100000000000'
Host	50	123	1	'000009001000000000000000001010000000000000000000000000000100000000000000'
Host	50	124	1	'000000001000000000000000001010000000000010000000000001000100000000000000'
Host	50	125	1	'000000001001000000001000011010000000000000000000000000000100001000000000'
Host	50	126	1	'000000001000000000000000000010000000000010000000000000000100000000000000'
Host	50	127	1	'000000001101000000000010001010000001000010000000000001000100000000000000'
Host	50	128	1	'000000001000000000000000011010000000000000000000000001000100000000000000'
Host	50	129	1	'000000001000000000000000011010000000000010000000000001000100000000000000'
Host	50	130	1	'000000001101000000000000001010000000000000000000000000000190000000000000'
Host	50	131	1	'000000001000000000000000011010000000000010000100000000000100000000000000'
Host	50	132	1	'000000001000000000000000001010000000000000000000000010000100000000000000'
Host	50	133	1	'000000001001000000001000000010000000000000000000000000000100001000000000'
Host	50	134	1	'000000001001000000009000001010000000001000000000001000000100000000000000'
Host	50	135	1	'000000001000000000000000011110000000000000000000000000000100001000000000'
Host	50	136	1	'000000001001000000001001000010000100000000000000000000000100001000000000'
Host	50	137	1	'000000001001000000001001000010011000001000000000000000000100000000000000'
Host	50	138	1	'000000001001000000000001001010001000001000000000000000000100000000000000'
Host	50	139	1	'000000001900000000000000091010000011010010000000000010000100000000000000'
Host	50	140	1	'000000001101000000000010091010000011000010000000000010000100000000000000'
Host	50	141	1	'000000001000000000000000091010000001000000000000000000000100000000000000'
Host	50	142	1	'000000001100000000000000000010000000000000000000000000010100000000000000'
Host	50	143	1	'000000001000010000000000000010000000010000000000000000000100001000000000'
Host	50	144	1	'000000001001000000000000000010001000000010000000000000000100000000000000'
Host	50	145	1	'000000001000090000000000000010000000010900000000000000000100000000000000'
Host	50	146	1	'000000001000000000000000000010000000000900000000000000000100000000000000'
Host	50	147	1	'000000001000000000000000001010010000000010000000000000000100000000000000'
Host	50	148	1	'000100001000000000000000000010000000000000000000000000001100000000000000'
Host	50	149	1	'000000011000000000000000000011000000000000000000000000000100000000000000'
Host	50	150	1	'000000001000001000000000011010000000000000000000000000000100001000000000'
Host	50	151	1	'000000001000001000000000011010000100000000000000000000000100000000000000'
Host	50	152	1	'000000001101000000000010001010000011000910000000000010000100001000000000'
Host	50	153	1	'000000001000000000000000011010000000000900000000000000000100001000000000'
Host	50	154	1	'000000001000000000000000001010000000001900000000000000000100000000000000'
Host	50	155	1	'000000001001000000000090000010000000000010000000000000000100000000000000'
Host	50	156	1	'000000000001000000000000000000000000000020000000000000001100000000000000'
Host	50	157	1	'000000001101001000000010001010000000000000000000000000001100001000000000'
Host	50	158	1	'000100001000001000000000000010000000000000000000000000000100000900000000'
Host	50	159	1	'000000001000001000000000001010000000000000000000000000000100000000000000'
Host	50	160	1	'000000001000000000000000001010000000000000000000009000000100000000000000'
Host	50	161	1	'000000001101000000000010001010000101000010000000000010000100000000000000'
Host	50	162	1	'000000001000000000000000001010000000000000000000011000000100000000000000'
Host	50	163	1	'000000001000000000000000011010000000001000000000001000000100001000000000'
Host	50	164	1	'000000001101000000000010001010000011000000000000000000000100001000000000'
Host	50	165	1	'000000001001000000001000001010000000000010000100001000000100000000000000'
Host	50	166	1	'000000001000000000000000001011000000001000000000001000000100000000000000'
Host	50	167	1	'000000001000000000000000011010000100000000000000001000001100001000000000'
Host	50	168	1	'000000001000000000000000011011000000090000000000011000001100001000000000'
Host	50	169	1	'000000001000000000000000011010000100010000000000001000000100001000000000'
Host	50	170	1	'000000001000000000000009011010000100000000000000000000000100001000000000'
Host	50	171	1	'000100001000000000000000001010000100000000000000001000000100000000000000'
Host	50	172	1	'000000001000000000000000011010000000000000000000000000000100000000010000'
Host	50	173	1	'000000001000000000000000011010000000000000000000000000001100101000000000'
Host	50	174	1	'000000001000000000000000011010000100009000000000000000000100001000000000'
Host	50	175	1	'000000001101000000000010001010000011000010000000000010001100000000000000'
Host	50	176	1	'000000001101000000000011001010000011000010000000000010001100000000000000'
Host	50	177	1	'020000001000000000000000011010000000000000000000010000000100001000000000'
Host	50	178	1	'000000001101000000001000001010000000000010000100000000000100001000000000'
Host	50	179	1	'000000001101000000001010001010000001000010000100000000000100000000000000'
Host	50	180	1	'000000001001000000001000000010000000001010000000000000000100000000000000'
Host	50	181	1	'000100001000000000000000001010000000000000000000000000001100000000000000'
Host	50	182	1	'000000001000000000000000001010000010000010000000011010000100000000000000'
Host	50	183	1	'000000001000000000000000001910000000001000000000001000001100000000000000'
Host	50	184	1	'000000001000000000000000001010000000000000000000001000001100000000001000'
Host	50	185	1	'000000001000001000000000000010000000000010000000001000001100000000000000'
Host	50	186	1	'000000001000001000000000011010000000000000000000000000001100001000000000'
Host	50	187	1	'020000001000001000000000011010000000000000000000001000001100001000000000'
Host	50	188	1	'000000001000000000000000901010000000000000000000001000000100000000000000'
Host	50	189	1	'000000011000000000000000000010000000000000000000001000001100000000000000'
Host	50	190	1	'000000001101000000000010001010000011000010000000000010000100000000001000'
Host	50	191	1	'000000001000000000000000001000000000000100000000100000000011010000000000'
Host	50	192	1	'000000001000011000000000000010000000010000000000000000000100000000000000'
Host	50	193	1	'000000001000000000000000000010000000009000000000000000000100000000000000'
Host	50	194	1	'000000001101000000000010001010000001000000000000000000000100000000000000'
Host	50	195	1	'000000001000000000000000000010000100001000000000001000000100000000000000'
Host	50	196	1	'000000011000000000000000001010000000100000000000000000001100000000000000'
Host	50	197	1	'000000001101000000000010001010000001000010100000000110000100000000000000'
Host	50	198	1	'000000001101000000000010001010000000000000000000000000000100000000000000'
Host	50	199	1	'000000001000000000000000001010000000000000000000000100001100000000000000'
Host	50	200	1	'000000001000000000000000001010000100001000000000001000001100000000000000'
Host	50	201	1	'000000001000000000000000000010000100001000000000001000001100000000000000'
Host	50	202	1	'000000001000000000000000011010000000001000000000011000001100001000000000'
Host	50	203	1	'000000001000000000000000000010000000001000000000001000001100000000000000'
Host	50	204	1	'000000001001000000001000000010000100000010000100000000000100000000000000'
Host	50	205	1	'000000001000000000000000000010000100000000000000000000001100000000000000'
Host	50	206	1	'000000001100000000000010011010000010000010000000000000000100001000000000'
Host	50	207	1	'000000001000000000000000011010000000000000000000000100000100001000000000'
Host	50	208	1	'000000001000000000000000001011000100000000000000000000000100000000000000'
Host	50	209	1	'000000001000000000000000001011000100000000000000001000000100001000000000'
Host	50	210	1	'000000001001000000001001000010011000000000000000001000000100000000000000'
Host	50	211	1	'000000001001000000000000001010000000000000000000001000001100000000000000'
Host	50	212	1	'000000001000000000000000011010000000000000000000001000000100101000000000'
Host	50	213	1	'020000001101001000000000001010000100000000000000000000000100001000000000'
Host	50	214	1	'000000001000000000000000011011000100090000000000000000001100000000000000'
Host	50	215	1	'000000001101000000000010001010000011000010000000000010001109000000000000'
Host	50	216	1	'000000001001000000001000000010000000000010000100000000001100000000000000'
Host	50	217	1	'000000001000000000009000001010000000009000000000000000000100000000000000'
Host	50	218	1	'000000001001000000001000001010000011009090000000000010000100000000000000'
Host	50	219	1	'020000001001000000001000000010000000000010000100000000000100000000000000'
Host	50	220	1	'020000001101000000000010001010000011000010000000000010000100000000000000'
Host	50	221	1	'000000000001000000000000001000000000000000000000101000000011010000000000'
Host	50	222	1	'000000001001000000000000001000000000000000000000100000000011000010000000'
Host	50	223	1	'000000001101000000000000000000000000000000000100100000000011000000000000'
Host	50	224	1	'000000001101000000000000001000000000000000000000100000000011000000000000'
Host	50	225	1	'000000001001000000000000000010000000000000000000000000000111000000000000'
Host	50	226	1	'000000001001000000000000000000000000000000000000101000000011000000000000'
Host	50	227	1	'000000000001000000000000001000000000000000000000000000000011000000000000'
Host	50	228	1	'000000001901000000000000000000000000000000000000100000000110000000000000'
Host	50	229	1	'000000009001000000000000000000000000000000000000100000000100000000000000'
Host	50	230	1	'020000001001000000000000001000000000000000000000100000000011000000000000'
Host	50	231	1	'000000001001000000000000001000000000000020000000100000000011000000000000'
Host	50	232	1	'000000001001000000000000000000000000000000000000101000000100001000000000'
Host	50	233	1	'000000001001000000000000091000000000000000000000101000000100001000000000'
Host	50	234	1	'000000001000000000000000001010000000000000000000100000000011000000000000'
Host	50	235	1	'000000001001000000000000001000000000000000000000000000000100000000000000'
Host	50	236	1	'000000001000000000000000001010000000000000000000101000000101000000000000'
Host	50	237	1	'000000001001000000000000000000000000000000000000100000000100001000000000'
Host	50	238	1	'000000001001000000000000091090000000000000000000101000000001001000000000'
Host	50	239	1	'000000001000000000000000000010000100000000000000100000000011000000000000'
Host	50	240	1	'000000001000000000000000011010000000000000000000000000000011000000000000'
Host	50	241	1	'000000001000000000000000001010000000000000000000900000000100000000000000'
Host	50	242	1	'000000001000000000000009001010000000000000000000900000000100001000000000'
Host	50	243	1	'000000001001000000009009010010001000000010000000000000000100001000000000'
Host	50	244	1	'000000001000000000000009011010000000000000000000000000000100001000000000'
Host	50	245	1	'020000001101000000000010001010000001000010000000001010000100000000000000'
Host	50	246	1	'010000001000000000000000000010000000000000000000000000000100000000000000'
Host	50	247	1	'000000001000010000000000000010000000010000000000000000000011000000000000'
Host	50	248	1	'000000001000000000000000001010000000000000000001000000000100010000000000'
Host	50	249	1	'000000001001000000001000001010000000000010000100000000000100000000000000'
Host	50	250	1	'000000001000000000000000000010000000000000000000000010000100000000000000'
Host	50	251	1	'000000001101000000000010001010000001000010000000010010000100000000000000'
Host	50	252	1	'000000001101001000000010001010000001000090000000000010001100000000000000'
Host	50	253	1	'000000001000000000000000001010000100000000000000000000000100001000000000'
Host	50	254	1	'000000001000001000000000001010000100000000000000001000000100000000000000'
Host	50	255	1	'000000001000001000000000001010000000000000000000001000000100000000000000'
Host	50	256	1	'000000001000001000000000011010000000000000000000900000000100001000000000'
Host	50	257	1	'000000001000000000000000001010000000000000000000000000000100001100000000'
Host	50	258	1	'000000001000000000000000001010000000000000000000000001000100000000000000'
Host	50	259	1	'000000001000000000000000001010000900000000000000000000000100000000000000'
Host	50	260	1	'000000001100000000000000001010000900000000000000000000000100000000000000'
Host	50	261	1	'020000001100000000000000001010000000000000000000000000000100000000000000'
Host	50	262	1	'000000001000000000000000001010000000009000000000001000000100000000000000'
Host	50	263	1	'000000001000000000000009001010000000000000000000000000000100000000000000'
Host	50	264	1	'000000001000000000000000000010000100001000000000000000009100000000000000'
Host	50	265	1	'000000001000000000000000000010000000001000000000000000009100000000000000'
Host	50	266	1	'000000001000000000000009011010000000000000000000000000009100001000000000'
Host	50	267	1	'000000001000001000000000011010000000010000000000000000000100001000000000'
Host	50	268	1	'000000001000000000000000011010000000009000000000000000000100001000000000'
Host	50	269	1	'000000001000000000000000001910000100000000000000010000000100000000000000'
Host	50	270	1	'000000001000000000000000001010000000000000000000000090000100000000000000'
Host	50	271	1	'000000001000000000000000001010000100000000000000000090001100000000000000'
Host	50	272	1	'000000001000000000000000011010000000000000000000000000000100009900000000'
Host	50	273	1	'000000001001001000000000000000000000000000000000000000000100000000000000'
Host	50	274	1	'000000001001000000001001000910011000000010000000000001000100000000000000'
Host	50	275	1	'000000001000000000001001000010011000000010000000000001000100000000000000'
Host	50	276	1	'000000001001000000001001000010011000001010000000000001000100000000000000'
Host	50	277	1	'000000001101000000001001001010011000000010000000000001000100000000000000'
Host	50	278	1	'000000001001000000001001000010011000000010000000000000001100000000000000'
Host	50	279	1	'000000001001000000001001000010011000000010000010000001001100000000000000'
Host	50	280	1	'000000001000000000000000011010011000000000000000000000000100000000000000'
Host	50	281	1	'000000001001000000001001000010011000000010000000000001000100000000000001'
Host	50	282	1	'000000001001000000001001000010011000010010000000000001000100000000000000'
Host	50	283	1	'020000001001000000001001000010011100000010000000000001000100000000000000'
Host	50	284	1	'000000001101000000000000001000011000000010000000000000000100001000000000'
Host	50	285	1	'000000001101000000001001001010011000000010000000000001001100001000000000'
Host	50	286	1	'000000001001000000001001000010011100000010000000011001000100000000000000'
Host	50	287	1	'000000001001000000001001000010011100000010000000010001000100000000000000'
Host	50	288	1	'000000001001000000001001000010011000000010000000001001001100000000000000'
Host	50	289	1	'000000001001000000001001000010011000000010000000001010000100000000000000'
Host	50	290	1	'000000001001000000001001000010011000000010000000000001001100000000001000'
Host	50	291	1	'000000001001001000001001000010011000000010000000000001000100000000000000'
Host	50	292	1	'000000001001001000001001000010011900000010000000000001001100000000000000'
Host	50	293	1	'000000001001001000001001000010011000000010000000000001001100000000000000'
Host	50	294	1	'000000001000000000000000001010011000000010000000000001000100000000000000'
Host	50	295	1	'000000001001000000001001000010011000000010009000000001001100000000000000'
Host	50	296	1	'000000001901000000001001000010011000000010000000000001000100000000000000'
Host	50	297	1	'000000001001000000001001000010011900000010000000000001000100000000000000'
Host	50	298	1	'000000001000000000000000001010000000009000000000000000000100000000000000'
Host	50	299	1	'000000001000000000000000001010000000000000000000000000000100001000001000'
Host	50	300	1	'000000011000000000000000001010000100100000000000010000000100000000000000'
Host	50	301	1	'000000001000000000000009011010000100001000000000000010000100000000000000'
Host	50	302	1	'000000001000000000000000001010000000000000000000000000000100009000000000'
Host	50	303	1	'000000001101000090000010001010000011000010000000000010000100000000000000'
Host	50	304	1	'000000001101000000000010001010000011000010000000000010009100000000000000'
Host	50	305	1	'000000001000000000000000001010000000000000000000001000009100000000000000'
Host	50	306	1	'000000001001001000001000000010000100000010000100001000001100000000000000'
Host	50	307	1	'020000001001000000001000000010000000009000000000001000001100001000000000'
Host	50	308	1	'000000001001000000001000000010000000099090000000000000001100001000000000'
Host	50	309	1	'000000001000000000000009011010000000000000000000101000000001000000000000'
Host	50	310	1	'020000001000000000000009000010000000000000000000000000001100000000000000'
Host	50	311	1	'000000001900000000000000001010000100000000000000000000001100000000000000'
Host	50	312	1	'000000001100000000000000001010000000900000000000000000000100000000000000'
Host	50	313	1	'000000001101000000000010001010000101000010000000001010001100000000000000'
Host	50	314	1	'000000001101000000000019001010000111000010000000000010001100000000000000'
Host	50	315	1	'000100001000000000000009000010000000000000000000000000001100001000000000'
Host	50	316	1	'000100001000000000009000001010000000001000000000000000000100001000000000'
Host	50	317	1	'000000001000000000000000011010000900000000000000100000001100001000000000'
Host	50	318	1	'000000001000000000000000001010000100001000000000000000001100000000000000'
Host	50	319	1	'000000001000000000000000011010000900000000000000000000000100001000000000'
Host	50	320	1	'020000001000000000000000011110000000000000000000000000000100001000000000'
Host	50	321	1	'000000001000000000000000011010000000000000000000100000000011000000000000'
Host	50	322	1	'000000001001001000001001000010011000000010000000011001000100000000000000'
Host	50	323	1	'000000001000000000000000011010000000000010000100010000001100000000000000'
Host	50	324	1	'000000001001000009001000000010000000000000000000000000000100000000000000'
Host	50	325	1	'020000901000001000000000001010000000000000000000000000000100000000000000'
Host	50	326	1	'000000001000000000000009011010000000000000000000000000001100001000000000'
Host	50	327	1	'020000001000000000000000011010000000000000000000000000001100001000000000'
Host	50	328	1	'000000001900000000000000000010000000000000000000000000000100000000000000'
Host	50	329	1	'000000001000000000000000000910000000001000000000000000001100000000000000'
Host	50	330	1	'000000001000000000000000000010000000001020000000000000001100000000000000'
Host	50	331	1	'000000001101000000000010001010000001000010000000001010000100000000000000'
Host	50	332	1	'000000001000000009190000011010000000001000000000001000000100001000000000'
Host	50	333	1	'000000001000000000000000011010000000000000000000000000000100011000000000'
Host	50	334	1	'000000001000000000000000011010000000000000000000000900000100001000000000'
Host	50	335	1	'000100001000000000000000001010000100000000000000000000000100000000000000'
Host	50	336	1	'000000001001000000001000000010000000001010000000001000000100000000000000'
Host	50	337	1	'000000001000000000000000001019000000000000000000000000000100000000000000'
Host	50	338	1	'000000001001000000000000000010000000000000000000100000000911000000000000'
Host	50	339	1	'000000001101000000101001000010011000000010000000000001000100000000001000'
Host	50	340	1	'020000001001000000001001000010011100000010000000000001001100000000001000'
Host	50	341	1	'000000001001000000001001000010011000000010000000001001000100000000000000'
Host	50	342	1	'000000001001000000001001000010011100000010000000001001009100000000000000'
Host	50	343	1	'000000001000000000000000001010000000000010000000001001000100000000000000'
Host	50	344	1	'000000001000000000000000011010000000000000000000009000000100001000000000'
Host	50	345	1	'000000001101000000001000001010000000000010000100000000009100000000000000'
Host	50	346	1	'000000001101000000000010001010000101090010000000000000000100000000000000'
Host	50	347	1	'000000001000000000000090009910000000000000000000000000000100000000000000'
Host	50	348	1	'000000001000000000000009011010010000001000000000000000000100000000000000'
Host	50	349	1	'000000001000000000000000000010000000000000000000000090000100000000000000'
Host	50	350	1	'000000001000001000000000011010000000000000000000001000000100001000000000'
Host	50	351	1	'000000001000000000000000011010000000000000000000000000001100001100000000'
Host	50	352	1	'000000001000010000000000000010000100010000000000001000000100000000000000'
Host	50	353	1	'000000001001000000001001000090011000000010000000900001000100000000000000'
Host	50	354	1	'010000001000000000000000000010000000001000000000001000000100000000000000'
Host	50	355	1	'000000001001001000001001000010011100000010000000000091000100000000000000'
Host	50	356	1	'000000001000000000000009001010000000000000000000900000000100000000000000'
Host	50	357	1	'000000001000000000000000001010000000000000000900000090000100000000000000'
Host	50	358	1	'000000001000001000009000000010000000000000000000900000001100000000000000'
Host	50	359	1	'000000001101000000000010001010000001000010000000010010001100000000000000'
Host	50	360	1	'000000001000000000000000001910000000000000000000000000001100000000000000'
Host	50	361	1	'000000001001001000001001000010011000000010000000010001000100000000900000'
Host	50	362	1	'000000001000000000000000001010000000091000000000000000001100100000000000'
Host	50	363	1	'000000001000000000000000001010000000001000000000000001000100000000000000'
Host	50	364	1	'000000001001000000001009001010011100000090000000001001000109000000000000'
Host	53	1	135	'000000001000000000000000001010000000000000000000000000000100000000000000'
Host	53	2	133	'000000001000000000000000011010000000000000000000000000000100001000000000'
Host	53	3	123	'000000001000100000000000000010000000000000000000000000000100000000000000'
Host	53	4	46	'000000001000110000000000000010000000010000000000000000000100000000000000'
Host	53	5	42	'000000001000000000000000001010000000001000000000000000000100000000000000'
Host	53	6	37	'000000001000000000000000011010000000000000000000000000000100000000000000'
Host	53	7	22	'000000001000000000000000000010000000000000000000000000000100000000000000'
Host	53	8	16	'000000001000000000000000001010000000000000000000000000000100001000000000'
Host	53	9	15	'000000001000000000000000001010000000000000000000000000001100000000000000'
Host	53	10	13	'000000001000000000000000001010000000000000000000001000000100000000000000'
Host	53	11	13	'000000001000000000000000011010000000000000000000001000000100001000000000'
Host	53	12	13	'000000001000100000000000000010000000000000000000000000001100000000000000'
Host	53	13	13	'000000001000000000000000011010000000000000000000000000001100001000000000'
Host	53	14	12	'000000001000000000000000000010000000001000000000000000000100000000000000'
Host	53	15	12	'000000001000000000000000011010000000001000000000000000000100001000000000'
Host	53	16	11	'000100001000000000000000001010000000000000000000000000000100000000000000'
Host	53	17	11	'000000001000100000000000000010000000000000000000001000000100000000000000'
Host	53	18	11	'000000001000110000000000000010000000010000000000001000000100000000000000'
Host	53	19	9	'000000001000000000000000011010000000010000000000000000000100001000000000'
Host	53	20	9	'000000001000000000000000011010000100000000000000000000000100000000000000'
Host	53	21	9	'000000001000100000000000000010000100000000000000000000000100000000000000'
Host	53	22	8	'000000001000000000000000011010000000010000000000000000000100000000000000'
Host	53	23	8	'000000001100000000000000001010000000000000000000000000000100000000000000'
Host	53	24	8	'000000001001000000000000001000000000000000000000100000000011000000000000'
Host	53	25	8	'000000001000000000000000011010000100000000000000000000000100001000000000'
Host	53	26	7	'000000001000000000000000001010000100000000000000000000000100000000000000'
Host	53	27	7	'000000001000100000000000000010000000000000000000000000000100001000000000'
Host	53	28	6	'000000001000100000000000001010000000000000000000000000000100000000000000'
Host	53	29	6	'000000001000110000000000000010000000000000000000000000000100000000000000'
Host	53	30	6	'000000001000110000000000000010000000010000000000000000001100000000000000'
Host	53	31	5	'000000001000000000000000001010000000010000000000000000000100000000000000'
Host	53	32	5	'000000001000000000000000001010000000001000000000000000000100100000000000'
Host	53	33	4	'000000001000000000000000001010000000000020000000000000000100000000000000'
Host	53	34	4	'000000001000000000000000011010000000000000000000000000000011000000000000'
Host	53	35	4	'000000001000000000000000001010000000001000000000001000000100000000000000'
Host	53	36	4	'000000001000000000000000011010000100000000000000001000000100001000000000'
Host	53	37	4	'000000101000100000000000000010000000000000000000000000000100000000000000'
Host	53	38	4	'000000001000100000000000000010000000010000000000000000000100000000000000'
Host	53	39	4	'000000001000110000000000000010000100010000000000000000000100000000000000'
Host	53	40	4	'000000001000000000000000001010000000000000000000001000001100000000000000'
Host	53	41	4	'000000001000100000000000000010000000000000000000001000001100000000000000'
Host	53	42	4	'000000001000000000000000011010000100000000000000000000001100001000000000'
Host	53	43	4	'000000001000000000000000011010000000000000000000001000001100001000000000'
Host	53	44	3	'000000001000000000000000011010000000000000000010000000000100001000000000'
Host	53	45	3	'020000001000000000000000001010000000000000000000000000000100000000000000'
Host	53	46	3	'020000001000000000000000011010000000000000000000000000000100001000000000'
Host	53	47	3	'000000001000000000000000091010000000000000000000000000000100000000000000'
Host	53	48	3	'000000001000000000000000001010000000000000000000001000000100001000000000'
Host	53	49	3	'000000001000000000000000001010000100000000000000001000000100000000000000'
Host	53	50	3	'000000001000100000000000000010000000000000000000001000000100001000000000'
Host	53	51	3	'000000001100100000000000000010000000000000000000000000000100000000000000'
Host	53	52	3	'000000001000110000000000000010000000110000000000000000000100000000000000'
Host	53	53	3	'000000001000110000000000000010000000010000000000010000000100000000000000'
Host	53	54	3	'000000001000000000000000011011000000000000000000000000000100001000000000'
Host	53	55	3	'000000001000000000000000001010000000001000000000000000001100000000000000'
Host	53	56	3	'000000001000000000000000001010000000001000000000001000000100001000000000'
Host	53	57	3	'000000001000100000000000000010000100000000000000000000001100000000000000'
Host	53	58	3	'000000001001000000001001000010011000000010000000000001000100000000000000'
Host	53	59	3	'000000001001000000001001000010011000000010000000001001000100000000000000'
Host	53	60	3	'020000001000100000000000000010000000000000000000000000000100000000000000'
Host	53	61	3	'000000001000001000000000011010000000000000000000000000000100001000000000'
Host	53	62	3	'000000001000000000000000001010000000009000000000000000000100000000000000'
Host	53	63	3	'000000001000100000000000000010000100000000000000001000000100000000000000'
Host	53	64	2	'000000001000000000000000001010000000000000000000000000010100000000000000'
Host	53	65	2	'001000001000000000000000001010000000000000000000000000000100000000000000'
Host	53	66	2	'000000011000000000000000001010000000000000000000000000000100000000000000'
Host	53	67	2	'000000001000000000000000001011000000001000000000000000000100000000000000'
Host	53	68	2	'000000001000000000000000001010000000000000000000000000009100000000000000'
Host	53	69	2	'000000001000000000000000001010000000001000000000000000000100001000000000'
Host	53	70	2	'000000001100000000000000011010000000000000000000000000000100001000000000'
Host	53	71	2	'000000001000000000000000000010000000010000000000000000000100000000000000'
Host	53	72	2	'000000001000000000000000011110000000000000000000000000000100001000000000'
Host	53	73	2	'000000001000000000000000001010000000000000000000000000000011000000000000'
Host	53	74	2	'000000001001000000000000001000000000000000000000100000000011100000000000'
Host	53	75	2	'000000001001000000000000001000000000000000000000110000000011000000000000'
Host	53	76	2	'000000001000010000000000000010000000010000000000000000000100000000000000'
Host	53	77	2	'000100001000000000000000001010000100000000000000000000000100000000000000'
Host	53	78	2	'000000001000000000000000001010000100001000000000000000000100000000000000'
Host	53	79	2	'000000001000000000000000000010000000000000000000001000000100001000000000'
Host	53	80	2	'000000001000000000000000011010000100000000000000001000000100000000000000'
Host	53	81	2	'000000001000100000000000000010000000010000000000001000000100000000000000'
Host	53	82	2	'000000001000100000000000001010000000001000000000000000000100000000000000'
Host	53	83	2	'000000001000100000000000000010000000001000000000000000000100000000000000'
Host	53	84	2	'000000001000100000000000011010000000000000000000000000000100001000000000'
Host	53	85	2	'000000001000100000000000000010000000010000000000000000000100001000000000'
Host	53	86	2	'000000001100100000000000000010000000000000000000000000011100000000000000'
Host	53	87	2	'000000001000100000000000000010000000000000000000000000001100001000000000'
Host	53	88	2	'000000001000100000000000000010000000000000000000010000000100000000000000'
Host	53	89	2	'000000001000190000000000000010000000010000000000000000000100000000000000'
Host	53	90	2	'000000001000100000009000000010000000000000000000000000000100000000000000'
Host	53	91	2	'000000001000000000000000011010000000010000000000000000001100000000000000'
Host	53	92	2	'000000001000000000000000011010000000000000000000000000001100000000000000'
Host	53	93	2	'000000001100000000000000001010000000000000000000000000001100000000000000'
Host	53	94	2	'000000001000000000000000011010000000001000000000000000001100000000000000'
Host	53	95	2	'000000001000001000000000011010000000000000000000000000000100000000000000'
Host	53	96	2	'000000001000001000000000001010000000001000000000000000000100000000000000'
Host	53	97	2	'000000011000000000000000000010000000000000000000000000000100000000000000'
Host	53	98	2	'000000001000000000000000001010000000000000000000100000001011000000000000'
Host	53	99	2	'000000001000000000000000011010000000000000000000000000009100001000000000'
Host	53	100	2	'000000001000000000000000000010000000001000000000000000000100001000000000'
Host	53	101	2	'000000001000100000000000000010000000000000000000000000000100009000000000'
Host	53	102	2	'000000001001000000000000001000000000000000000000100000001011000000000000'
Host	53	103	2	'000100001000000000000000001010000000000000000000000000000100001000000000'
Host	53	104	2	'020000001000000000000000001010000000000000000000000000001100000000000000'
Host	53	105	2	'000000001000000000000000001010000100000000000000001000001100000000000000'
Host	53	106	2	'000100001000000000000000001010000000000000000000001000000100000000000000'
Host	53	107	2	'000000001000110000000009000010000000010000000000000000000100000000000000'
Host	53	108	2	'000000001000000000000000011010000100000000000000091000001100001000000000'
Host	53	109	2	'000000001000110000000000000010000000010000000000001000001100000000000000'
Host	53	110	2	'000000001000000000000000001010000000000000000000010000000100000000000000'
Host	53	111	2	'000000001000101000000000000010000000000000000000000000000100000000000000'
Host	53	112	2	'000000001000100000000000001010000000000000000000000000000100001000000000'
Host	53	113	2	'020000001000000000000000001010000100000000000000000000000100000000000000'
Host	53	114	1	'000100001000000000000000001010000000001000000000000000000100000000000000'
Host	53	115	1	'000000001000000000000000011010000000000000000100000000000100000000000000'
Host	53	116	1	'000000001000000000000000011010000000000000000000000000000100100000000000'
Host	53	117	1	'000000001000000009000000001010000000001000000000000000000100000000000000'
Host	53	118	1	'000000101000000000000000001010000000000000000000000000000100000000000000'
Host	53	119	1	'000000001090000000000000001010000000000000000000000000000100000000000000'
Host	53	120	1	'000000001000000000000000001010000000000000000000009000000100000000000000'
Host	53	121	1	'000000001000000000200000001010000000000000000000000000000100000000000000'
Host	53	122	1	'000000001000009000000000001010000000001000000000000000000100000000000000'
Host	53	123	1	'000000001000000000000000001010000000000010000000000000000100000000000000'
Host	53	124	1	'000000001001000000000000001010000000000900000000000000000100000000000000'
Host	53	125	1	'000000001100000000000000011010000000000000000000000000000100000000000000'
Host	53	126	1	'000000001000000000000000011010000000000010000000000001000100000000000000'
Host	53	127	1	'000000001000000000000000011010000000000010000000000000000100000000000000'
Host	53	128	1	'000000001000000000000000001011000000000000000000000000000100001000000000'
Host	53	129	1	'000000001000000000000000001010000000000000000000000000000100009000000000'
Host	53	130	1	'000000001000000000000000011010000000000000000000000000000100011000000000'
Host	53	131	1	'000000001000000000009000011010000000000000000000000000000100001000000000'
Host	53	132	1	'000000001000000000000000011010000000001000000000000000000100001000010000'
Host	53	133	1	'000000001000009000000000011010000000010000000000000000000100001000000000'
Host	53	134	1	'000100001000000000000000011010000000000000000000000000000100001000000000'
Host	53	135	1	'000000001000000000000000011010000000000000000000000000000100001000000001'
Host	53	136	1	'000000001000000000000000011010000000001000010000000000000100001000000000'
Host	53	137	1	'000000001100000000000000000010000000010000000000000000000100000000000000'
Host	53	138	1	'000000001000000000000000000010000000010000000000000000000100001000000000'
Host	53	139	1	'000000001000010000000000011010000000000000000000000000000100001000000000'
Host	53	140	1	'000000001000000000000000011010000000000000000000000000000100009000000000'
Host	53	141	1	'000000001000000000000000011010000000000010000000000000000100001000000000'
Host	53	142	1	'000000001000000000000000011010000000010000000010000000000100001000000000'
Host	53	143	1	'000000001000000000000000011010010000000000000000000000000100001000000000'
Host	53	144	1	'000000001001000000000000001000000000000000000000000001000100000000000000'
Host	53	145	1	'000000000000000000000000001010000000000000000000000000000100000000000000'
Host	53	146	1	'020000001000000000000000001010000000100000000000000000000100000000000000'
Host	53	147	1	'000000001000000000000000001010000000009000000000000000000100001000000000'
Host	53	148	1	'000000001000000000000000001010000000009000000000000000000100100000000000'
Host	53	149	1	'000000001001000000000000001010000000001000000000000000000100001000000000'
Host	53	150	1	'001000001001000000000000001000000000000000000000100000000011000000000000'
Host	53	151	1	'000100001001000000000000001000000000000000000000100000000011000000000000'
Host	53	152	1	'000000001000000000000000001010000000000000000000000000000101000000000000'
Host	53	153	1	'000000000001000000000000001000000000000010000000100000000011010000000000'
Host	53	154	1	'000000000001000000000000000000000000000020000000100000000011000000000000'
Host	53	155	1	'000000001101000000000000000000000000000000000100100000000011000000000000'
Host	53	156	1	'000100000001000000000000001000000000000000000000100000000011000000000000'
Host	53	157	1	'000000000001000000000000001000000000000000000000100000000011000000000000'
Host	53	158	1	'000000001000000000000009011010000000000000000000000000000100001000000000'
Host	53	159	1	'000000001000000000000000000010000000001000000000000000000011000000000000'
Host	53	160	1	'000000001001000000000000001010000000000000000000000000000100000000000000'
Host	53	161	1	'000000001000000000009000090010000000000000000000000000000100001000000000'
Host	53	162	1	'000000001000909000000000001010000000000000000000000000000100000000000000'
Host	53	163	1	'000000001000000000000000011010000000000020000000000000000100001000000000'
Host	53	164	1	'000000001000000000000000000010000000000000000000000000000100001000000000'
Host	53	165	1	'000000001000000000000000001010000000000900000000000000000100000000000000'
Host	53	166	1	'000000001000000000000000001010000100000000000000000000000100001000000000'
Host	53	167	1	'000000001000000000000000000010000100001000000000000000000100000000000000'
Host	53	168	1	'000000001000000000000000001010000000000000000010001000000100000000000000'
Host	53	169	1	'000000001000000000000000011010000000000000000000001000000100000000000000'
Host	53	170	1	'000000001000000000000000011010000000000010000000001000000100001000000000'
Host	53	171	1	'000000001000000000000009011010000000000000000000001000000100001000000000'
Host	53	172	1	'000000001000090000000000001010000000000000000000001000000100001000000000'
Host	53	173	1	'000000001000000000000000011010000000001000000000001000000100001000000000'
Host	53	174	1	'000000001000110009000000000010000000010000000000001000000100000000000000'
Host	53	175	1	'000000001001100000000000000010000000000000000000000000000100000000000000'
Host	53	176	1	'000000001000100000000001000010000000000000000000000000000100000000000000'
Host	53	177	1	'000000001000100000000000000010000000100000000000000000000100000000000000'
Host	53	178	1	'000000001000110000000000001010000000000000000000000000000100000000000000'
Host	53	179	1	'000000001000110000000000000010000000010000000010000000000100000000000000'
Host	53	180	1	'000000001000110000000000000010000000010000000000000000000100000010000000'
Host	53	181	1	'000000001000100000000010000010000000000000000000000000000100000000000000'
Host	53	182	1	'000000001000110000000000009010000000000000000000000000000100000000000000'
Host	53	183	1	'000000001000110000000000000010000000010000000000000000009100000000000000'
Host	53	184	1	'000000001000100000000000001010000000000020000000000000000100001000000000'
Host	53	185	1	'000000001000110000000000011010000000000000000000000000000100001100000000'
Host	53	186	1	'000000001000100000000000000010000000000000000000000000000100000900000000'
Host	53	187	1	'000000001000110000000000000010000000010000000000000000001100000000009000'
Host	53	188	1	'000000001100100000000000000010000000000000000000000000010100000000000000'
Host	53	189	1	'000000001000100000010000000010000000000000000000000000000100001000000000'
Host	53	190	1	'000000001000100000000000100010000100010000000000000000000100000000000000'
Host	53	191	1	'000000101000100000000000000010000100000000000000000000000100000000000000'
Host	53	192	1	'000000001000190000000000000010000000090000000000000000000100000000000000'
Host	53	193	1	'000000001000000000000000001010000000000029000000000000000100000000000000'
Host	53	194	1	'000000001000110000000000000010000000001000000000000000000100000000000000'
Host	53	195	1	'000000001000100000000000000010000000000000000000000000000100001900000000'
Host	53	196	1	'000100001000000000000000001010000000000000000000001000000100001000000000'
Host	53	197	1	'000000001000000000000000011010000000000000000000009000000100001000000000'
Host	53	198	1	'000000001000000000000009001010000000001000000000000000001100000000000000'
Host	53	199	1	'000000001000110000000000011110000000000000000000000000000100000000000000'
Host	53	200	1	'000100001000000000000000001010000100000000000000000000001100000000000000'
Host	53	201	1	'000000001101000000000000000011000000000000000000000000001100001000000000'
Host	53	202	1	'000000001000000000000010001010000000000000000000000000000100000000000000'
Host	53	203	1	'000000001000000000000000000010000000000000000000000000000011000000000000'
Host	53	204	1	'000000001001000000000000001000000000000000000000900000000100001000000000'
Host	53	205	1	'000000001101000000000000000000000000000000000000000000000100001000000000'
Host	53	206	1	'000000001000000000001001000010000000010000000000000000000100001000000000'
Host	53	207	1	'000000001100010000000000000010001000001001000000090000000100000000000000'
Host	53	208	1	'000000001000001000000000001010000000001000000000000000000100100000000000'
Host	53	209	1	'000000011000000000000000000010000000000000000000000000001100000000000000'
Host	53	210	1	'000000001000000000000000000010000000000000000000010000000100000000000000'
Host	53	211	1	'000000001000000000000000011011000000000000000000000000000100000000000000'
Host	53	212	1	'000000001000100000000000000010000000000000000000000000010100000000000000'
Host	53	213	1	'000000001000010000000000000010000000001000000000000000000100000000000000'
Host	53	214	1	'000000001000000000000000011010000000009000000000000000000100001000000000'
Host	53	215	1	'000000001000000000000000011010000000000000000000100000000100000000000000'
Host	53	216	1	'000000001000110000000000001010000000001000000000000000000100000000000000'
Host	53	217	1	'000000001000100000000010000010000000000000000000000000001100000000000000'
Host	53	218	1	'000000001000000000000000011010000000000000000900000000000100001000000000'
Host	53	219	1	'000000001000000000000000011010000000009000000000000000000100000000000000'
Host	53	220	1	'000100001000000000000000009010000000001000000000000000000100000000000000'
Host	53	221	1	'000000001000000000000000011010000000011000000000000000000100001000000000'
Host	53	222	1	'000000001001000000000000001010000000001000000000000000000100000000000000'
Host	53	223	1	'000000001100000000000010001010000011000010000000000000000100000000000000'
Host	53	224	1	'020000001000000000000000011010000000000000000000000000001100000000000000'
Host	53	225	1	'000000001100000000000000001010000000010000000000000000000100000000000000'
Host	53	226	1	'020000001000110000000000000010000000010000000000000000000100000000000000'
Host	53	227	1	'020000001000100000000000000010000000000000000000001000000100001000000000'
Host	53	228	1	'000000001000110000000001000010000000010000000000000000000100000000000000'
Host	53	229	1	'000000001100110000000000000010000000010000000000000000000100000000000000'
Host	53	230	1	'000000001000110000000000000000000000000000000000000000000011000000000000'
Host	53	231	1	'000000001000110000000000000010000000010000000000100000000011000000000000'
Host	53	232	1	'000000001101000000000010001010000001000010000000000010000100000000000000'
Host	53	233	1	'000000101000100000000000000010000000000000000000000000000110001000000000'
Host	53	234	1	'000000001000110000000000000010000000010000000000090000001100000000000000'
Host	53	235	1	'000100001000100000000000000010000000000000000000090000001100000000000000'
Host	53	236	1	'000000001000110000000000000010000000000000000000090000001100001000000000'
Host	53	237	1	'000000001000100000000000000010000000000000000000090000000100000900000000'
Host	53	238	1	'000000001000100000000000000010000000000000000000090000000100001000000000'
Host	53	239	1	'000000001000000000000000000010000000001000000000010000000100000000000000'
Host	53	240	1	'000000001000000000000090000010000000001000000000000000000100000000000000'
Host	53	241	1	'000000001000000000000000000010000000000000000000100000000011000000000000'
Host	53	242	1	'000100001000000000000000001000000100000000000000100000000011010000000000'
Host	53	243	1	'000000000001090000000000001000000100000000000000101000000011010000000000'
Host	53	244	1	'000000001101000000000000000000000000000020000000100000000011000000000000'
Host	53	245	1	'000000001101000000000000000000000000000020000000100000000010001000000000'
Host	53	246	1	'000000001101000000000000001000000000000000000000110000001011000000000000'
Host	53	247	1	'000000001001000000000000001000000100000000000000100000000011000000009000'
Host	53	248	1	'020000001000000000000000011010000000000000000000001000009100001000000000'
Host	53	249	1	'000000001000000000000000011010000000000000000000001000009100001000000000'
Host	53	250	1	'020000001000000000000000011010000000000000000000000000001100001000000000'
Host	53	251	1	'020000001000000000000000011010000000010000000000001000000100001000000000'
Host	53	252	1	'020000001000000000000000011010000000000000000000001000000100001000000000'
Host	53	253	1	'000000001000100000000000010010000000000000000000001000001100000000000000'
Host	53	254	1	'000000001000000000000000011010000000001000000000001000001101000000000000'
Host	53	255	1	'000000001000000000000000011010000000000000000000090000001100001000000000'
Host	53	256	1	'000000001000110000000000000010000100000000000000001000001100000000000000'
Host	53	257	1	'000000001000000000000000010010000100000010000000000001000100000000000000'
Host	53	258	1	'000000001000000000000000011010000100000000000000000000000100101000000000'
Host	53	259	1	'000000001100000000000000001010000100000000000000000000000100000000000000'
Host	53	260	1	'000000001000101000000000000010000100001000000000000000000100000000000000'
Host	53	261	1	'000000001000000000001000011010000100000000000000000000001100000000000000'
Host	53	262	1	'000100001000000000000000001010000000001000000000001000000100001000000000'
Host	53	263	1	'020000001000000000000000001010000000001000000000000000000100100000000000'
Host	53	264	1	'000000001000000000000000001010000000001000000000001000001100000000000000'
Host	53	265	1	'000000001000001000000000001010000000001000000000001000001100000000000000'
Host	53	266	1	'000000001000090000000000011010000000000000000000000000001100001000000000'
Host	53	267	1	'000000001000100000000000001010000000000000000000000000009100000000000000'
Host	53	268	1	'000000001100100000000000000010000000000000000000000000000100001000000000'
Host	53	269	1	'000000001000100000000000000010000000000000000000001000000100101000000000'
Host	53	270	1	'000000001000110000000000000010000000010000000000001000000100001100000000'
Host	53	271	1	'000000001000001000000000001010000100001000000000001000000100000000000000'
Host	53	272	1	'000000001000000000000000000010000100000000000000001000000100000000000000'
Host	53	273	1	'000000001000000000000000000010000000000000000000001000000100000000000000'
Host	53	274	1	'000000001101000000001001000010011101000010000000001001000100000000000000'
Host	53	275	1	'000000001000000000000000001010010100000000000000000000000100000000000000'
Host	53	276	1	'000000001001000000001000000010000000001010000000001000000100000000000000'
Host	53	277	1	'000000001000000000000000011010000000000000000000000000000100001010000000'
Host	53	278	1	'000000001101000000000010001010000010000000000001000000000100000000000000'
Host	53	279	1	'000000001000000000000000011010000000001010000000000000000100000000000000'
Host	53	280	1	'000000001000000000000000001010000000000000000000000000000100100000000000'
Host	53	281	1	'000000001900000000000000091010000000000000000000000000001100000000000000'
Host	53	282	1	'000100001000100000000000000010000000000000000000000001000100000000000000'
Host	53	283	1	'000000001000001000000000011010000000000000000000000000001100001000000000'
Host	53	284	1	'000000001000000000000000011010000000000000000000100000000011000000000000'
Host	53	285	1	'000000001000000000000000000010000000000000000000001000001100101000000000'
Host	53	286	1	'000000001000000000000000001010000000000000000000000100000100000000000000'
Host	53	287	1	'000000001000000000000000011010000100000000000000000010000100001000000000'
Host	53	288	1	'000000001000001000000000011010000100000000000000000000000100001000000000'
Host	53	289	1	'000000001000000000000000011011000100000000000000000000000100000000000000'
Host	53	290	1	'000000001000100000000000001010000100000000000000000000000100000000000000'
Host	53	291	1	'000000001000110000000000000011000000000000000000000000000100000000000000'
Host	53	292	1	'000000001000110000000000091010000000000000000000000000000100000000000000'
Host	53	293	1	'000000001000100000000000010010000000000000000000000000000100000000000000'
Host	53	294	1	'000000001000000000000000001010000000010000000000001000000100000000000000'
Host	53	295	1	'000000001000001000000009001010000000001000000000001000000100001000000000'
Host	53	296	1	'000000000000000000000000011010000000001000000000000000000100000000000000'
Host	53	297	1	'000000001000000000000009011010000000000000000000000000000100000000000000'
Host	53	298	1	'000000001000000000000009000010000000001000000000000000000100000000000000'
Host	53	299	1	'000000001100000000000000001010000000010000000000000000000100001000000000'
Host	53	300	1	'000000001000000000000000001010000000000000000000000000011100000000000000'
Host	53	301	1	'000000001000000000000000011010000000900000000000000000000100001000000000'
Host	53	302	1	'000000001900000000000000001010000000000000001000000000000100000000000000'
Host	53	303	1	'000000001000100000000000000010000000001000000000100000000100000000000000'
Host	53	304	1	'000000001000000000000000000010000000001000000000000000009100000000000000'
Host	53	305	1	'000000001000110000000000000010000100000000000000000000000100000000000000'
Host	53	306	1	'000000001100110000000000000010000100010000000000000000001100000000000000'
Host	53	307	1	'000000001000101000000000000010000100000000000000000000001100000000000000'
Host	53	308	1	'000000001000110000000000000010000100010000000000009000000100000000000000'
Host	53	309	1	'000000001000100010000009000010000100000000000000000000000100000000000000'
Host	53	310	1	'000000001000001000000000001010000100000020000000000000001100000000000000'
Host	53	311	1	'020000001000101000000000000010000100000000000000000000001100000000000000'
Host	53	312	1	'020000001000100000000000000010000100000000000000000000000100001000000000'
Host	53	313	1	'000000001000000000000000000010000000001000000000000000001100000000000000'
Host	53	314	1	'020000001000001000000000001010000000000000000000001000001100000000000000'
Host	53	315	1	'000000001000001000000000001910000000001000000000001000000100000000000000'
Host	53	316	1	'020000001000000000000000011010000100000000000000001000001100001000000000'
Host	53	317	1	'020000001000000000000000011010000100000000000000001000001100000000000000'
Host	53	318	1	'000000001101000000000000000000000100000000000000001000000100001000000000'
Host	53	319	1	'020000001000000000000000001010000000001000000000001000001100000000000000'
Host	53	320	1	'000000001000000000000000001011000100000000000000001000000100000000000000'
Host	53	321	1	'000000001000000000000000001010000100001000000000001000001100000000000000'
Host	53	322	1	'000000001000000000000000001910000000000000000000001000000100000000000000'
Host	53	323	1	'000000001000000000000000001010000000000000000000001000000100100000000000'
Host	53	324	1	'000000001000000000000000001010000000000000000000000000000100000900000000'
Host	53	325	1	'000000001001000000000000001000000000000000000000100000000011000010000000'
Host	53	326	1	'000000001001000000000000001000000000000000000000101000001011000000000000'
Host	53	327	1	'000000000101000000000000001000000000000000000000100000000011010000000000'
Host	53	328	1	'000000001101000000000000001000000000000000000000100000000011000000000000'
Host	53	329	1	'000000001000000000000000001010000000009000000000001000001100000000000000'
Host	53	330	1	'000000001001000000000009001000000000000000000000101000000011000000000000'
Host	53	331	1	'000000001101000000000000001000000000000000000000101000001011000000000000'
Host	53	332	1	'000000001000000000000000011010000100001000000000000000000100001000000000'
Host	53	333	1	'000000001101000000000000001010000000001000000000000000000100001000000000'
Host	53	334	1	'000000001000001000000000000010000000001000000000000000000100000000000000'
Host	53	335	1	'000000001000000000000000001000000000000000000000000000000100000000000000'
Host	53	336	1	'000000001001000000000000001000000000010000000000000000001100000000000000'
Host	53	337	1	'000000001000110000000000000000000000000000000000100000000011000000000000'
Host	53	338	1	'000000001001000000000000001000000000000000000000000000001100000000000000'
Host	53	339	1	'000000001000000000000000011000000000000000000000000000000100000000000000'
Host	53	340	1	'000000001000000000000000001010000100001000000000001000000100000000000000'
Host	53	341	1	'000000001000000000000000000910000100000000000000001000001100000000000000'
Host	53	342	1	'000000001000000000000000000010000000001000000000000000000000000000000000'
Host	53	343	1	'000000001000100000000000000010000000001000000000001000000100000000000000'
Host	53	344	1	'000000001000101000000000000010000000000000000000001000000100000000000000'
Host	53	345	1	'000000001000110000000000000010000000019000000000001000000100000000000000'
Host	53	346	1	'000000001000000000000000011010000100000000000000090000000100001000000000'
Host	53	347	1	'000000001000000000000000000010000100001000000000001000000100000000000000'
Host	53	348	1	'000000001000000000000000011010000100001000000000090000010100001000000000'
Host	53	349	1	'000000001000100000000000000010000011000010000000001010001100000000000000'
Host	53	350	1	'000000001000100000000000000010000000000000000000101000000011000000000000'
Host	53	351	1	'000000001000110000000000000010000000010000100000000000001100000000000000'
Host	53	352	1	'000000001000100000000000000010000000000000000000001000000109000000000000'
Host	53	353	1	'000000001000001000000000001910000100000000000000000000001100000000000000'
Host	53	354	1	'000000001000000000000000011010000000000000000000000000000100101000000000'
Host	53	355	1	'000000011000000000000000000010000000001000000000000000000100000000000000'
Host	53	356	1	'020000001000000000000000011010000100000000000000000000000100000000000000'
Host	53	357	1	'000000001000000000000000001010000000000000000000010010000100000000000000'
Host	53	358	1	'000000001000001000000000011010000000000000000000011000000100001000000000'
Host	53	359	1	'020000001000001000000000000000000000010000000000001000000100000000000000'
Host	53	360	1	'000000001000000000000000011010000000000000000000011000000100001000000000'
Host	53	361	1	'000000011000000000000000000010000000001000000000001000000011000000000000'
Host	53	362	1	'000000000001000000000000001000000000000000000000100000001011010000000000'
Host	53	363	1	'000000001000110000000000000010000100100000000000000000009100000000000000'
Host	53	364	1	'000000001000010000000000000010000000010000000000000000000100001000000000'
Host	53	365	1	'020000001000000000000000001010000000001000000000000000000100000000000000'
Host	53	366	1	'000000001000000000000000001010000000000000000100000000001100000000000000'
Host	53	367	1	'020000001000000000000000011010000000000000000000010000000100100000000000'
Host	53	368	1	'000000001000100000000000000011000000000000000000000000001100000000000000'
Host	53	369	1	'000000001000000000000000001010000000000010000000001000000100000000000000'
Host	53	370	1	'000000001100000000000000001010000000000000000000000000009100000000000000'
Host	53	371	1	'000000001000000000000000011010000000009010000000000000000100001000000000'
Host	53	372	1	'000000001000000000000000001010000000001000000000000000001100100000000000'
Host	53	373	1	'000000001000001000000000001010000000001000000000000000001100000000000000'
Host	53	374	1	'000000001000111000000000000010000100000000000000001000000100000000000000'
Host	53	375	1	'020000001000110000000000000010000100010000000000001000000100000000000000'
Host	53	376	1	'000000001000900000000001000010000000000000000000000000000100000000000000'
Host	53	377	1	'000000001000100000000000000010000900000000000000000000000100000000000000'
Host	53	378	1	'000000001000101000000000000010000100000000000000001000000100010000001000'
Host	53	379	1	'000000001100000000000009001010000000000000000000000000000100000000000000'
Host	53	380	1	'000000001100000000000000000010000000000000000000000000000100000000000000'
Host	53	381	1	'000000001000000000000009001010000100000000000000001000001100000000000000'
Host	53	382	1	'000000001100000000000000001010000100000000000000001000000100000000000000'
Host	53	383	1	'000000001000000000000000000010000100000000000000001000001100000000000000'
Host	53	384	1	'000000001000100000000000900010000000000000000000000000001100000000000000'
Host	53	385	1	'000000001000100000000000000010000000000000000000000000000100010000001000'
Host	53	386	1	'000000001100110000000000000010000000010000000000001000000100000000000000'
Host	53	387	1	'020000001000000000000000001010000000000000000000001000001100001000000000'
Host	53	388	1	'020000001100100000000000090010000100000000000000000000001100000000000000'
Host	53	389	1	'020000001000000000000000000010000100009000000000001000001100000000000000'
Host	53	390	1	'020000001000100000000000000010000000000000000000001000001100000000000000'
Host	53	391	1	'000000001000100000000000000010000100000000000000001000001100000000000000'
Host	53	392	1	'000000001000100000000009000010000100000000000000000000000100000000000000'
Host	53	393	1	'000000001000001000000000011010000000010000000000001000009100000000000000'
Host	53	394	1	'000000001000001000000000000010000100091000000000000000000100000000000000'
Host	53	395	1	'000000001000000000000000011010000000010000000000000000000110000000000000'
Host	53	396	1	'000000001000000000000000011019000100000000000000000000000100001000000000'
Host	53	397	1	'009000001000000000000000001010000000000000000000000000000100000000000000'
Host	53	398	1	'000000001000001000000000011010000000000000100000000000000100001000000000'
Host	53	399	1	'020000001000001000000000011010000000000000000000000000000100001000000000'
Host	53	400	1	'000000001000001000000000001010000000000000000000000000900100000000000000'
Host	53	401	1	'000000001000101000000000000910000000000000000000000000001100000000000000'
Host	53	402	1	'020000001101901000000010001010000000000000000000100000001011000000000000'
Host	53	403	1	'000000001000110000000000000010000010010000000000010000000100000000000000'
Host	53	404	1	'000000001000000000000000011010000000000000000000010000000100001000000000'
Host	53	405	1	'000000001000000000000000000010000000000000000000000000000110000000000000'
Host	53	406	1	'000000001000090000000000000010000000001000000000000000001100000000000000'
Host	53	407	1	'000000001000000000000000001010000000000000000000900000000100001100000000'
Host	53	408	1	'000000001000100000000000090010000000000000000000001000000100000000000000'
Host	53	409	1	'000000001000000000000000001010000000000000000000900000000100000000000000'
Host	53	410	1	'000000001000000000000000011010000000000000000000000000009011000000000000'
Host	53	411	1	'000000001100000000000000001010000000001000000000001001000100000000000000'
Host	53	412	1	'000000000101000000000000001000000000000000000000000000000100000000000000'
Host	53	413	1	'000000001100000000000000001010000000001000000000000000001100000000000000'
Host	53	414	1	'000000001000100000000000000019000000000000000000001000000100000000000000'
Host	53	415	1	'000100001000100000000000000010000000000000000000000000000011000000000000'
Host	53	416	1	'000000001100900000000000011010000000000000000000001000001011000000000000'
Host	53	417	1	'000000001000100000000000011010000000000010000000000000000100001000000000'
Host	53	418	1	'000000001000111000000000001010000000000000000000001000000100001000000000'
Host	53	419	1	'000000001000000000000000000010000000000000000000000000001100000000000000'
Host	53	420	1	'000000001000001000000009000010000000000000000000011000001100000000000000'
Host	53	421	1	'000000011000000000000000000010000100000000000000000000000100000000000000'
Host	53	422	1	'000000001001000000000009001000000100010000000000000000000100000000000000'
Host	53	423	1	'020000001000001000000000001010000000001000000000000000001100000000000000'
Host	53	424	1	'020000001000100000000000000010000000000000000000000000001100000000000000'
Host	53	425	1	'020000001000101000000000000010000000000000000000001000000100000000000000'
Host	53	426	1	'000100001000100000000000000010000000000000000000000090000100000000000000'
Host	53	427	1	'020000001000111000000000000010000000010000000000000000000100000000000000'
Host	53	428	1	'000000001000100000000000000010000000000000010000000090000100000000000000'
Host	53	429	1	'000000001000100000000000000010000000000000000000000090009100000000000000'
Host	53	430	1	'000000001000100000000009000010000000000000000000000000000100000000000000'
Host	53	431	1	'000000101000100000000000000010000000000000000000900000000100000000000000'
Host	53	432	1	'000000001000190000000000011010000000090000000000000000000100001000000000'
Host	53	433	1	'000000001000000000000000000010000000090000000000000000000100000000000000'
Host	53	434	1	'000000001900000000000000011010000000000000000000000000000100001000000000'
Host	53	435	1	'000000001001000000000000001000000100000000000000101000000011000000000000'
Host	53	436	1	'000000001000000000000000001090000000000000000000001000000011000000000000'
Host	53	437	1	'000000001000000000000000001010000100100000000000000000000100000000000000'
Host	53	438	1	'009000001101000000000000001000000000000000000000101000000011000000000000'
Host	53	439	1	'000000001000000000000000011010000100000000000010001000001100001000000000'
Host	53	440	1	'000000001000000000000000001010000000001000000000000000000109000000000000'
Host	53	441	1	'000000001000100000000000000010000100000000000000009000000100000000000000'
Host	53	442	1	'000000001000101000000000000010000100000000000000000010000100000000000000'
Host	53	443	1	'000000001000110000000000000910000000010000000000000000000100000000000000'
Host	53	444	1	'000000001100000000000000001010000000010000000000001010000100000000000000'
Host	53	445	1	'000000001000000000009000000010000000000000000000000000000110000000000000'
Host	53	446	1	'000000001000000000000000011010000100010000000000000000001100000000000000'
Host	53	447	1	'000000001000000000000000000010000000001000000000001000000100000000000000'
Host	53	448	1	'000000001000100000000000000010000000000000000000000001000100001000000000'
Host	53	449	1	'000000001101000000000000001000000000000000000000100000001011000000000000'
Host	53	450	1	'000000001000000000000000011010000000000000000000000000010100000000000000'
Host	53	451	1	'020000001001000000001001000910009000000000000000000000000100000000000000'
Host	53	452	1	'000000901000000000000000000010000000000000000000000000000100000000000000'
Host	53	453	1	'000000001000000000000000001010000000001000000000010000000100000000000000'
Host	53	454	1	'000000001000000000000000000010000000000000000900010000000100001000000000'
Host	53	455	1	'000000001100000000009000001010000000000000000000000000000100000000000000'
Host	53	456	1	'000000001000000000000000001010000000000020000000001000001190000000000000'
Host	53	457	1	'000090001000010000000000000010000000090010000000001000000100000000000000'
Host	53	458	1	'000000001000000000000000011010000000001000000000000000000100001000000909'
Host	53	459	1	'000000001000000000000000000010010000000000000000000000000100000000000000'
Host	53	460	1	'000000001000000000000000001011000000001000000000000000000100001000000000'
Host	53	461	1	'000000001001000000001001000010011100090010000000000001000100000000000000'
Host	53	462	1	'000000001000100000000000000010000000000000000000000010000100000000000000'
Host	53	463	1	'020000001100090000000010001010000011000010000000000010000100000000000000'
Host	53	464	1	'000000001000101000000000000010010000000000000000900000001100000000000000'
Host	53	465	1	'000000001000000000000000011011000900090000000000000000000100001000000000'
Host	53	466	1	'000000001000111000000000000010000000090000000000000000000100001000000000'
Host	53	467	1	'000000001000000000000000011010000000000000000000000001000100001000000000'
Host	53	468	1	'000000001000001000000000001010000100000000000000000000000100000000000000'
Host	53	469	1	'000000001000100000000000000010009100000000000000001000000100000000000000'
Host	53	470	1	'020000001000100000000000000010009000000000000900010000000100001000000000'
Host	53	471	1	'000000001000091000009000000010000000001000000000000000000100000000000000'
Host	53	472	1	'000000001000000000000000000010010000001000000000000000001100000000000000'
Host	53	473	1	'000000009001000000000000009010010000000000000000000000000100000000000000'
Host	53	474	1	'020000001000000000000000011010000000001000000000000000001100001000000000'
Host	53	475	1	'000000001000000000000000000010000000001000000000001001000100000000000000'
Host	53	476	1	'000000001000000000000000001010000000000000000100000000000100000000000000'
Host	53	477	1	'020000001000000000000000009010000000000000000000001000000100000000000000'
Host	53	478	1	'000000000001000000000000001000000000010000000000101000000011000000000000'
Host	53	479	1	'000000001101000000000000001000000000000000000000101000000011000000000000'
Host	53	480	1	'000000001001000000100000001000000100000000000000100000000011000000000000'
Host	53	481	1	'000000001000110000000000090010000000010000000000009000000100000000000000'
Host	53	482	1	'000000001000100000000000000090000000000000000000000000000100000000000000'
Host	53	483	1	'000000001000000000000000001010000000001000000000001000000100100000000000'
Host	53	484	1	'000000001000000000000000011910000000000000000000001000000100001000000000'
Host	53	485	1	'000000001000000000000000011010000000001000000000001000000100000000000000'
Host	53	486	1	'000000001000110009100000000010000000910000000000000000000100000000000000'
Host	53	487	1	'000000001000000000000000009010000000000000000000000000000100000000000000'
Host	53	488	1	'000000001000901000000000011010000100001000000000001000000100001000000000'
Host	60	1	114	'000000001101000000000010001010000001000010000000000010000100000000000000'
Host	60	2	79	'000000001101000000000010001010000011000010000000000010000100000000000000'
Host	60	3	64	'000000001000110000000000000010000000010000000000000000000100000000000000'
Host	60	4	42	'000000001000100000000000001010000000000000000000000000000100000000000000'
Host	60	5	31	'000000001101000000000010001010000001000010100000000110000100000000000000'
Host	60	6	30	'000000001000100000000000000010000000000000000000000000000100000000000000'
Host	60	7	29	'000000101000100000000000000010000000000000000000000000000100000000000000'
Host	60	8	26	'000000001101000000000000001000000000000000000000100000000011000000000000'
Host	60	9	26	'000000001100110000000000000010000000010000000000000000000100000000000000'
Host	60	10	18	'000000001101000000000010001010000001000010100100000110100100000000000000'
Host	60	11	12	'000000001101000000000010001010000001000010000000001010000100000000000000'
Host	60	12	11	'000000001101000000000010001010000001000010000000000000000100000000000000'
Host	60	13	10	'000000001101000000000010001010000001000010000000000010001100000000000000'
Host	60	14	8	'000000001101000000000010001010000011000010000000001010000100000000000000'
Host	60	15	7	'000000001101000000000010001010000001000010100000000110001100000000000000'
Host	60	16	7	'000000001101000000000010001010000000010000000000000000000100000000000000'
Host	60	17	7	'000000001101000000001000000011000000000010000100000000000100000000000000'
Host	60	18	7	'000000101000100000000000000011000000000010000000010000000100000000000000'
Host	60	19	6	'000000001101000000000010001010000001000010000000010010000100000000000000'
Host	60	20	6	'000000001101000000000010001010000000000000000000000000000100000000000000'
Host	60	21	6	'001000001101000000000000001000000000000000000000100000000011000000000000'
Host	60	22	5	'000000001101000000000000001000000000000000000000100000000100000000000000'
Host	60	23	5	'001000011101000000000000001000000000000000000000100000000011000000000000'
Host	60	24	5	'000000001000000000000000001010000000000000000000000000000100000000000000'
Host	60	25	5	'000000001000110000009000000010000000010000000000000000000100000000000000'
Host	60	26	5	'000000001000110000000000000010000000010000000000001000000100000000000000'
Host	60	27	5	'000000001001000000001001000010001000000010000000000001000100000000000000'
Host	60	28	4	'000000001000000000000000001010000000001000000000000000000100000000000000'
Host	60	29	4	'000000001000000000000000011010000000000000000000000000000100001000000000'
Host	60	30	4	'000000001101000000000010001010000011000010000000000000000100000000000000'
Host	60	31	4	'000000001101000000000000001000000000000010000000100000000011000000000000'
Host	60	32	4	'000000001001000000000000001000000000000000000000100000000011000000000000'
Host	60	33	4	'000000001100110000000000000010000000010000000000001000000100000000000000'
Host	60	34	4	'000000101000100000009000000010000000000000000000000000000100000000000000'
Host	60	35	4	'000000001000110000000000000010000000010000000000000000000011000000000000'
Host	60	36	4	'000000001000100000000000001010000000000000000000000000001100000000000000'
Host	60	37	4	'000000001000110000000000000010000000010000000000010000000100000000000000'
Host	60	38	4	'000000001000100000000000000010000000010000000000000000000100000000000000'
Host	60	39	4	'000000001000110000000000000010000011000010000000000010000100000000000000'
Host	60	40	4	'000000001000110000001000000010000000010000000000000000000100000000000000'
Host	60	41	4	'000000001000110000000000000010000100010000000000000000000100000000000000'
Host	60	42	4	'000000001101000000001001000010001000000010000000000001000100000000000000'
Host	60	43	3	'000000001101000000000010001010000001000010100000001110000100000000000000'
Host	60	44	3	'000000001101000000000000001000000000010000000000000000000100000000000000'
Host	60	45	3	'000000001001000000001000000010000000000010000100000000000100000000000000'
Host	60	46	3	'000000001001000000000000001000000000000010000000100000000011100000000000'
Host	60	47	3	'000000001101000000000019001010000001000010000000000010000100000000000000'
Host	60	48	3	'000000001101000000000010001010000011000010000000000010009100000000000000'
Host	60	49	3	'000000011101000000000000001000000000000000000000100000000011000000000000'
Host	60	50	3	'000000001101000000000000001000000000000020000000100000000011000000000000'
Host	60	51	3	'000000001101000000000000001000000000000000000100100000000011000000000000'
Host	60	52	3	'000000101000100000000000000010000000000000000000000000000011000000000000'
Host	60	53	3	'000000001101000000000010001010000111000010000000000010000100000000000000'
Host	60	54	3	'020000001101000000000010001010000001000010000000000010000100000000000000'
Host	60	55	3	'000000001101000000000010001010000001000010000000001010001100000000000000'
Host	60	56	3	'000000001101000000000010001010000001000010000000000010009100000000000000'
Host	60	57	3	'000000001000110000000000000010000000000000000000000000000100000000000000'
Host	60	58	3	'000000001100100000000000000010000000000000000000000000000100000000000000'
Host	60	59	3	'000000101000100000000000001010000000000000000000000000000100000000000000'
Host	60	60	3	'000000101000110000000000000010000000010000000000000000000100000000000000'
Host	60	61	3	'000000101000100000000000000010000000000000000000001000000100000000000000'
Host	60	62	3	'000000001000111000000000000010000000010000000000000000000100000000000000'
Host	60	63	3	'000000101000100000000000000011000000000010000000000000000100000000000000'
Host	60	64	3	'000000001000100000000000000010000000000000000000000000001100000000000000'
Host	60	65	3	'000000001000100000000000001010000000000000000000001000000100000000000000'
Host	60	66	3	'000000001001000000001001000010011000000010000000000001000100000000000000'
Host	60	67	2	'000000001101000000000010001010000000000010000000000010000100000000000000'
Host	60	68	2	'000000001101000000000000001000000000000010000000100000000100000000000000'
Host	60	69	2	'000000001101010000000010001010000011000010000000000010000100000000000000'
Host	60	70	2	'000000001101010000000010001010000001000010000000000010000100000000000000'
Host	60	71	2	'000000001101000000000010001010000001000010100000000000000100000000000000'
Host	60	72	2	'000000001100000000000010001010000001000010000000000010000100000000000000'
Host	60	73	2	'000000001101000000000010001011000001000010000000000010000100000000000000'
Host	60	74	2	'000100001101000000000010001010000011000010000000000010000100000000000000'
Host	60	75	2	'000000001101000000000010001010000101000010100000000110000100000000000000'
Host	60	76	2	'000000001101000000000000001000000011000010000000000010000100000000000000'
Host	60	77	2	'000000001101000000001000000010000000000010000100000000000100000000000000'
Host	60	78	2	'000000001001000000000000001000000000000000000000100000000100000000000000'
Host	60	79	2	'000000001101000000000010001010000101000010000000000010000100000000000000'
Host	60	80	2	'000000001101000090000010001010000001000010000000000010000100000000000000'
Host	60	81	2	'000000001101001000000010001010000001000010000000000010000100000000000000'
Host	60	82	2	'000000001101000000000000001000000000000000000100100000000100000000000000'
Host	60	83	2	'000000001101000000000010001010000111000010000000001010001100000000000000'
Host	60	84	2	'000000001101000000000010001011000001000010000000001010000100000000000000'
Host	60	85	2	'000000001101000000001000000011000000010010000100000000000100000000000000'
Host	60	86	2	'000000001101000000000000000010000000010000000000000000000100000000000000'
Host	60	87	2	'000000001101000000000000001000000000000000000000100000001100000000000000'
Host	60	88	2	'000000001101000000200010001010000001000010000000000010000100000000000000'
Host	60	89	2	'000000001001000000000000001000000000000000000000101000000011000000000000'
Host	60	90	2	'000000001101000000000019001010000001000010000000001010000100000000000000'
Host	60	91	2	'000000001101000000000010001010000101000010000000000010009100000000000000'
Host	60	92	2	'000000001101000000000010001010000000010000000000000000000100000000010000'
Host	60	93	2	'020000001000110000000000000010000000010000000000000000000100000000000000'
Host	60	94	2	'000000001101000000000010001010000001000010100000000110009100000000000000'
Host	60	95	2	'000000001000100000000010001010000001000010000000000010000100000000000000'
Host	60	96	2	'000000001000100000009000000010000000000000000000000000000100000000000000'
Host	60	97	2	'000000001000100000000000001010000011000010000000000010000100000000000000'
Host	60	98	2	'000000001100110000000000001010000011000010000000000010000100000000000000'
Host	60	99	2	'000000101100100000000000000010000000000000000000000000000100000000000000'
Host	60	100	2	'000000001000100000001000000010000000000000000000000000000100000000000000'
Host	60	101	2	'000000001000100000000000001010000000000010000000000000000100000000000000'
Host	60	102	2	'000000001000110000000000000010000000010000000000000000001100000000000000'
Host	60	103	2	'000000001000110000000000000010000000010000000000001000001100000000000000'
Host	60	104	2	'000000001000100000000000001010000000010000000000000000000100000000000000'
Host	60	105	2	'000000001000110000000010000010000000010000000000000000000100000000000000'
Host	60	106	2	'000000001000100000000000000010000100000000000000000000000100000000000000'
Host	60	107	2	'000000001000100000000010001010000000000000000000000000000100000000000000'
Host	60	108	2	'000000001000100000000000000010000000000000000000000010000100000000000000'
Host	60	109	2	'000000001000110000000000000010000100010000000000001000000100000000000000'
Host	60	110	2	'000000001100110000000000000010000000010000000000000000000100000900000000'
Host	60	111	2	'000000001100100000000000001010000000000000000000000000000100000000000000'
Host	60	112	2	'000000001101000000000010001010000011000010000000000010001100000000000000'
Host	60	113	2	'000000101000100000000009000010000000000000000000010000000100000000000000'
Host	60	114	2	'000000001100110000000000000010000100010000000000001000000100000000000000'
Host	60	115	1	'000000001101000000000010000010000000000000000000000010000100000000000000'
Host	60	116	1	'000000001101000000000000000010000000000000000000000000000100000000000000'
Host	60	117	1	'000000001101000000000010001000000000000000000000000000000100000000000000'
Host	60	118	1	'000000001101000000000010001000000000000000000000100000000100000000000000'
Host	60	119	1	'000000001101000000000010001010000001000010000000000010000000000000000000'
Host	60	120	1	'000000001101000000000010001010000011000000000000000000000100000000000000'
Host	60	121	1	'000000001100000000000010001010000011000010000000000010000100000000000000'
Host	60	122	1	'000000001101000000000010001010000011000010000000000010000100000090000000'
Host	60	123	1	'000000001101000000000010001010000001000010100100000000000100000000000000'
Host	60	124	1	'000000001101000000000010001010000001000010100100009110100100000000000000'
Host	60	125	1	'000000001101000000000011001010000001000010100100000110100100000000000000'
Host	60	126	1	'000000001101000000000010001010000001000010000000000110100100000000000000'
Host	60	127	1	'000000001101000000000000000000000011000010000000000010000100000000000000'
Host	60	128	1	'000000001101000000000010001010000011000000000000100000000100000000000000'
Host	60	129	1	'000000001101000000000010001010000011000010100000000010000100000000000000'
Host	60	130	1	'000000001101000000009010001010000011000010000000000010000100000000000000'
Host	60	131	1	'000000001101000000000010001010000011000010000100000010000100000000000000'
Host	60	132	1	'000000001101000000900010001010000001000010010000000010000100000000000000'
Host	60	133	1	'000000001101000000000010001010000011000010000000000100000100000000000000'
Host	60	134	1	'000000001101000000000010001010000001000010000000000011000100000000000000'
Host	60	135	1	'000000001101000000000010001010000001000010009000000010000100000000009000'
Host	60	136	1	'000000001101000000000010001010000001000010100000000010000100000000000000'
Host	60	137	1	'000000001101000000000011001010000001000010100000090110000100000000000000'
Host	60	138	1	'010000001101000000000010001010000001000010000000000010000100000000000000'
Host	60	139	1	'000000001101000090000000000010000001000010000000000010000100000000000000'
Host	60	140	1	'000000001101000000000010001010000011000010100100000000000100000000000000'
[truncated: 10,931 more rows]

## Sheet: Note on genotype representation
0: Original bases in the wild-type host
1 and 2: Identified dominant mutations
9: Unidentified mutations in dominant mutation cites
D: Deletions specific to each parasite species
